# Supplementary material for: 3-Aminothiophenecarboxylic acid (3-Atc)-induced folding in peptides
Source: Royal Society of Chemistry journal article supplement (doi:10.1039/c6nj01667g), 2016-01-01
Supplement: c6nj01667g1.pdf [file c6nj01667g1.pdf]

## Electronic Supporting Information

### 3-Aminothiophenecarboxylic acid (3-Atc)-induced folding in peptides

Tukaram S. Ingole,<sup>a</sup> Amol S. Kotmale,<sup>b</sup> Rupesh L. Gawade,<sup>c</sup> Rajesh G. Gonnade,<sup>c</sup>  
Pattuparambil R. Rajamohanan<sup>b</sup> and Gangadhar J. Sanjayan<sup>\*a</sup>

|                                                                                      |         |
|--------------------------------------------------------------------------------------|---------|
| Contents                                                                             | S1      |
| HRMS spectra of compounds                                                            | S2-S4   |
| <sup>1</sup> H NMR spectra of compounds                                              | S5-S7   |
| <sup>13</sup> C and DEPT-135 spectra of compounds                                    | S8-S13  |
| DMSO- <i>d</i> <sub>6</sub> titration of compounds of <b>2</b> , <b>3</b> , <b>1</b> | S14-S16 |
| Variable Temperature studies of compounds of <b>2</b> , <b>3</b> , <b>1</b>          | S17-S19 |
| 2D TOCSY, COSY, HSQC, HMBC and NOESY spectra of <b>2</b>                             | S20-S23 |
| 2D COSY and NOESY spectra of <b>3</b>                                                | S23-S24 |
| 2D TOCSY, COSY, HSQC, HMBC and NOESY spectra of <b>1</b>                             | S25-S28 |
| X-ray crystallographic data of tripeptide <b>2</b>                                   | S29-S30 |
| Molecular dynamics study of <b>1</b>                                                 | S31     |
| CD spectra of Gly-3-Atc-Pro oligomers                                                | S32     |

tuka\_21 #108 RT: 0.47 AV: 1 NL: 2.17E9  
T: FTMS + p ESI Full ms [85.40-1281.00]

# HRMS

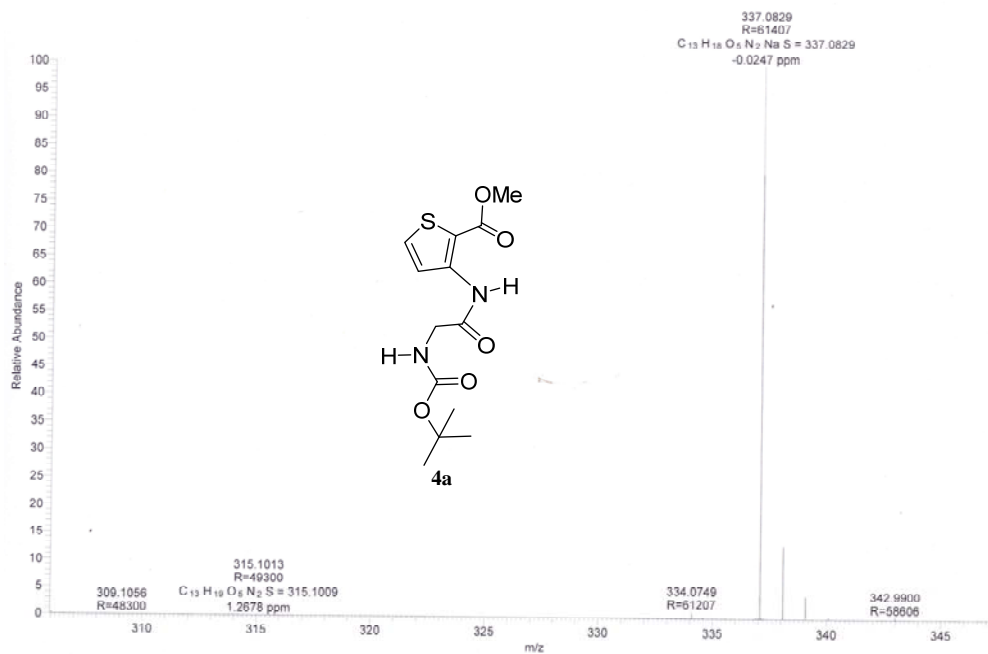

tuka\_24 #111 RT: 0.50 AV: 1 NL: 1.12E9  
T: FTMS + p ESI Full ms [85.40-1281.00]

# HRMS

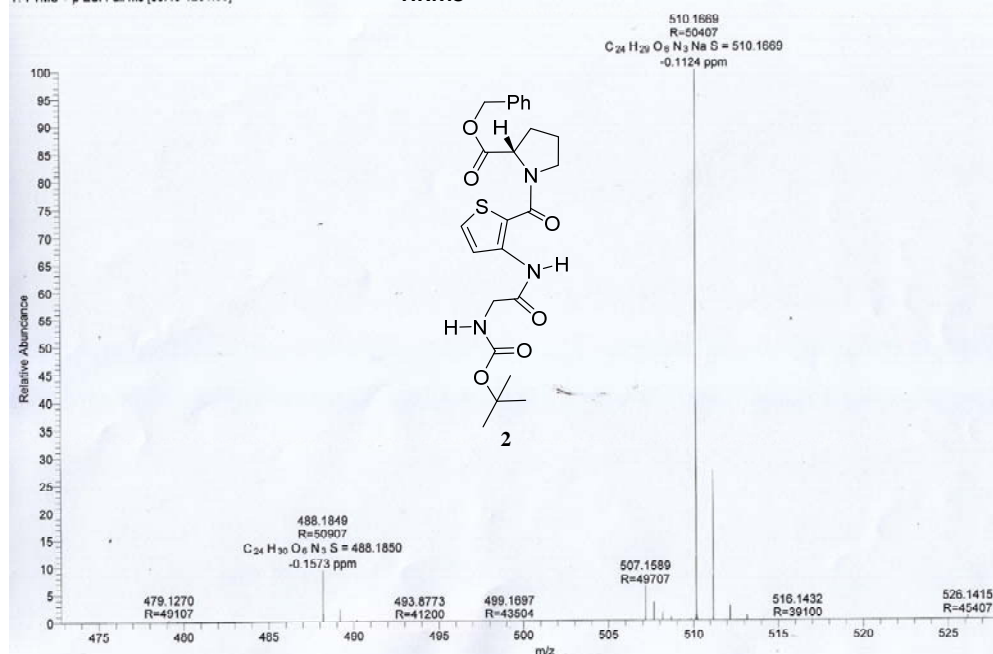

TU-4-TRIN-IVE #884 RT: 3.94 AV: 1 NL: 1.14E9  
T: FTMS + p ESI Full ms [150.00-2250.00]

# HRMS

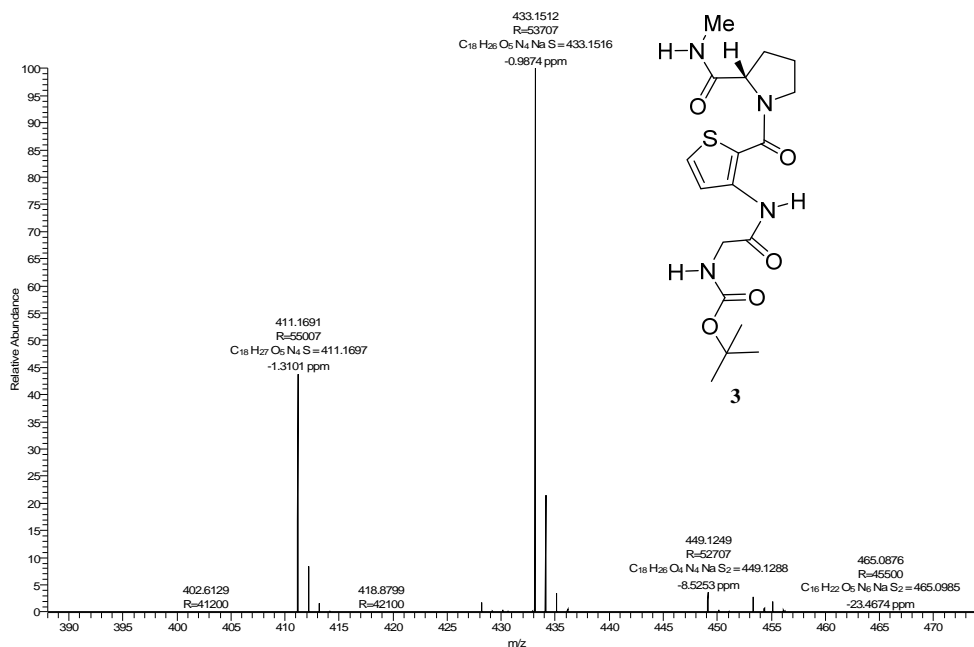

TU-4-TRIN-IVE #884 RT: 0.52 AV: 1 NL: 2.76E8  
T: FTMS + p ESI Full ms [85.40-1281.00]

# HRMS

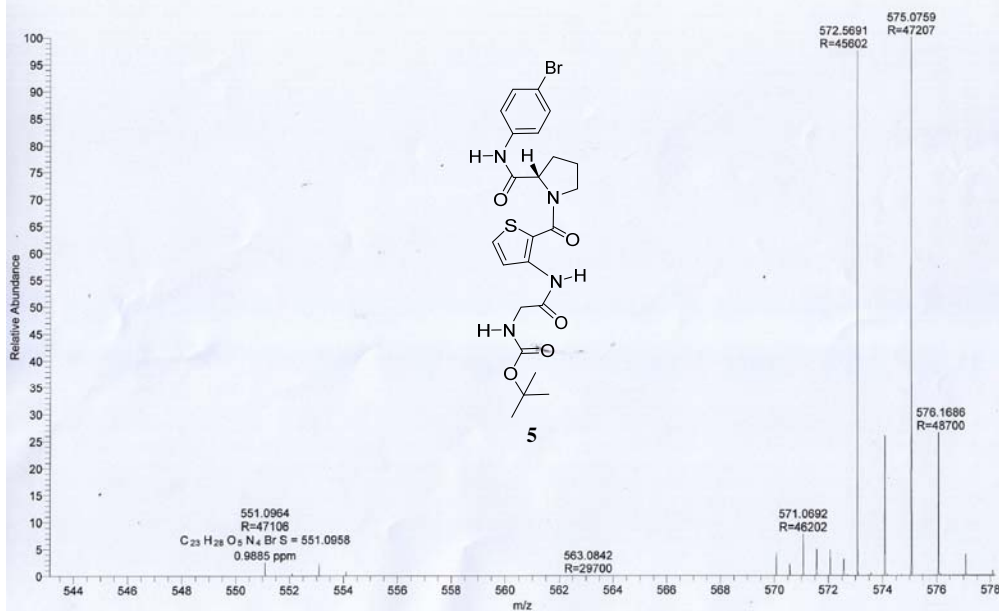

TUKA-3-HEX-PRV #961 RT: 4.28 AV: 1 NL: 5.53E8  
T: FTMS + p ESI Full ms [150.00-2250.00]

# HRMS

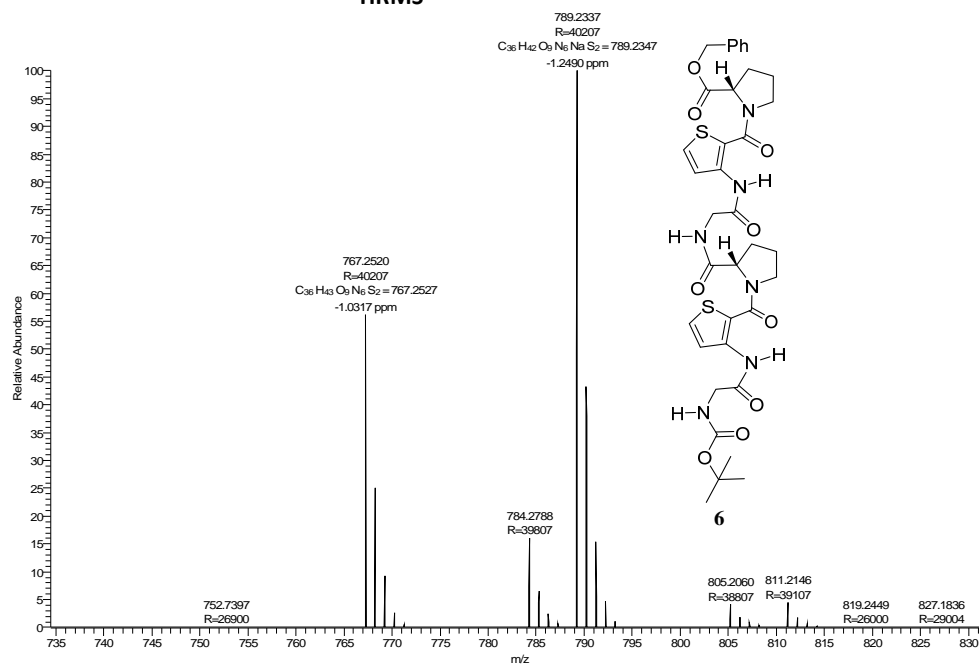

tuka\_26 #93 RT: 0.42 AV: 1 NL: 6.54E8  
T: FTMS + p ESI Full ms [65.40-1281.00]

# HRMS

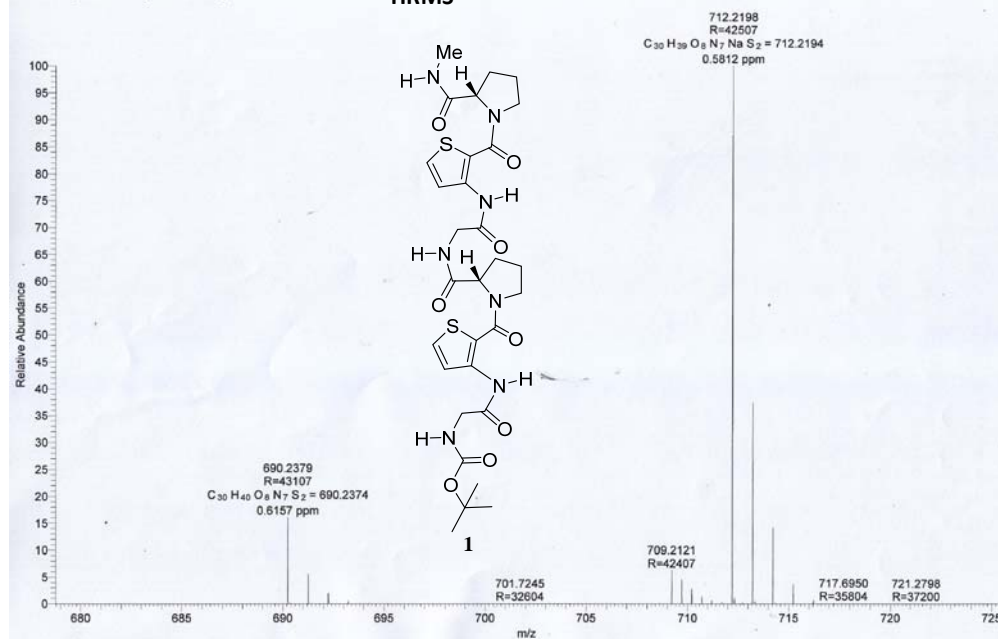

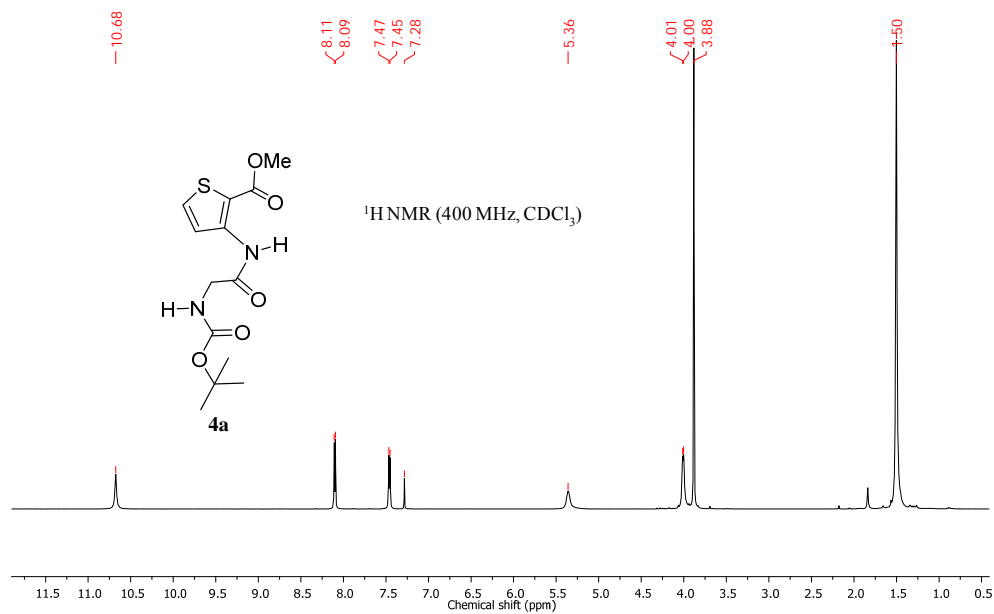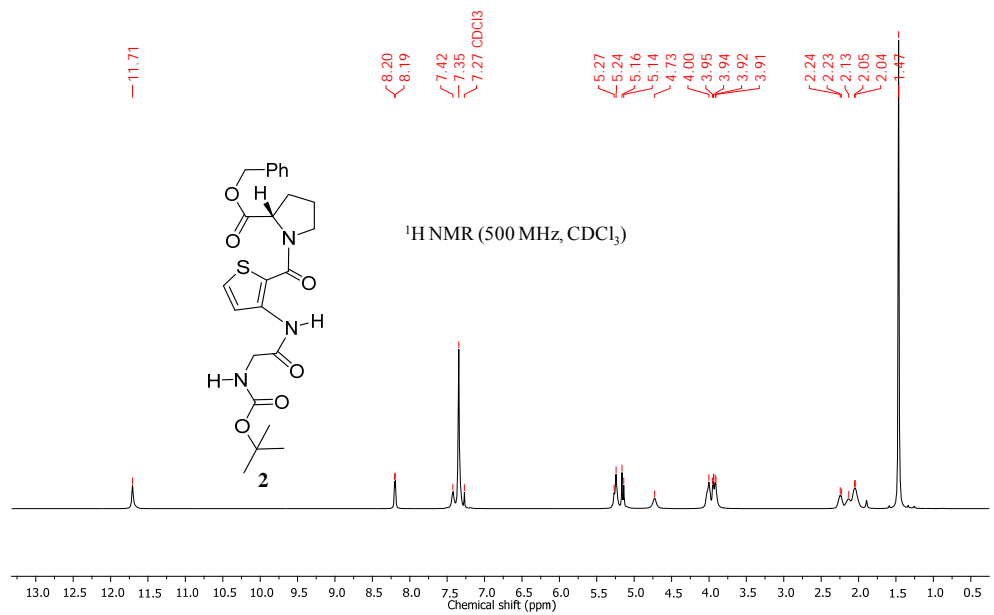

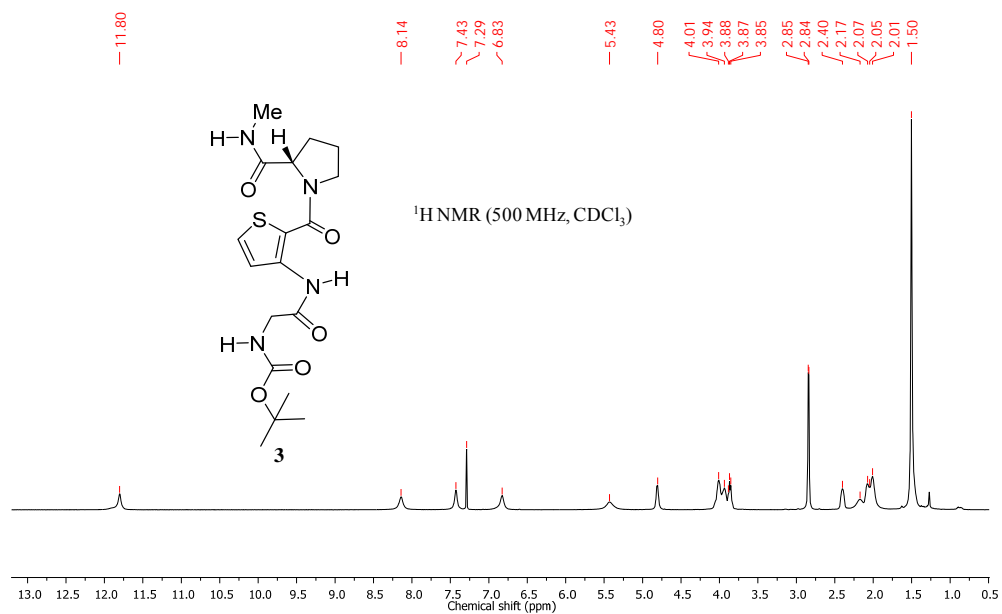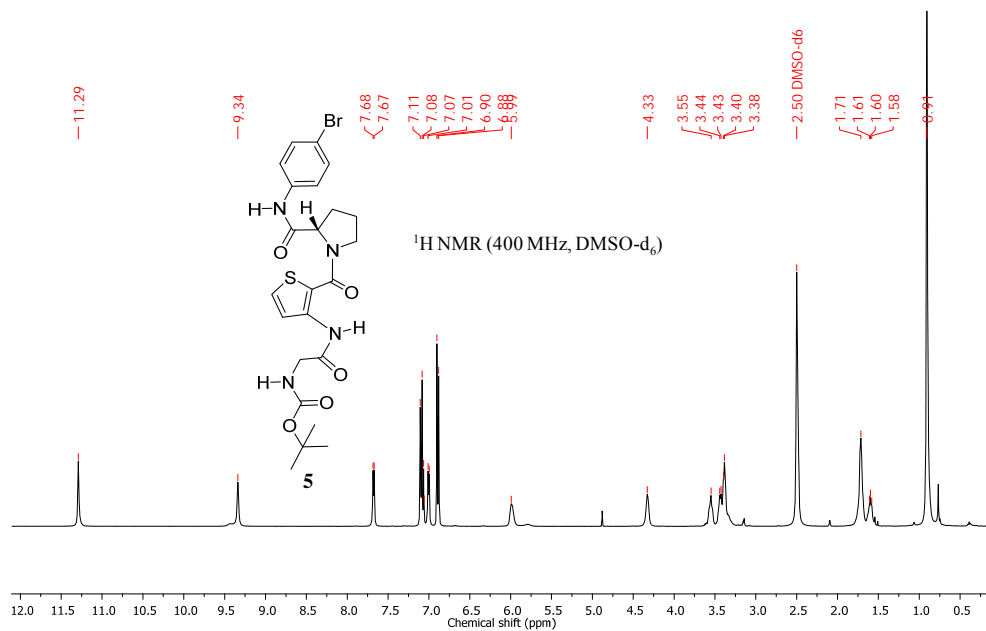

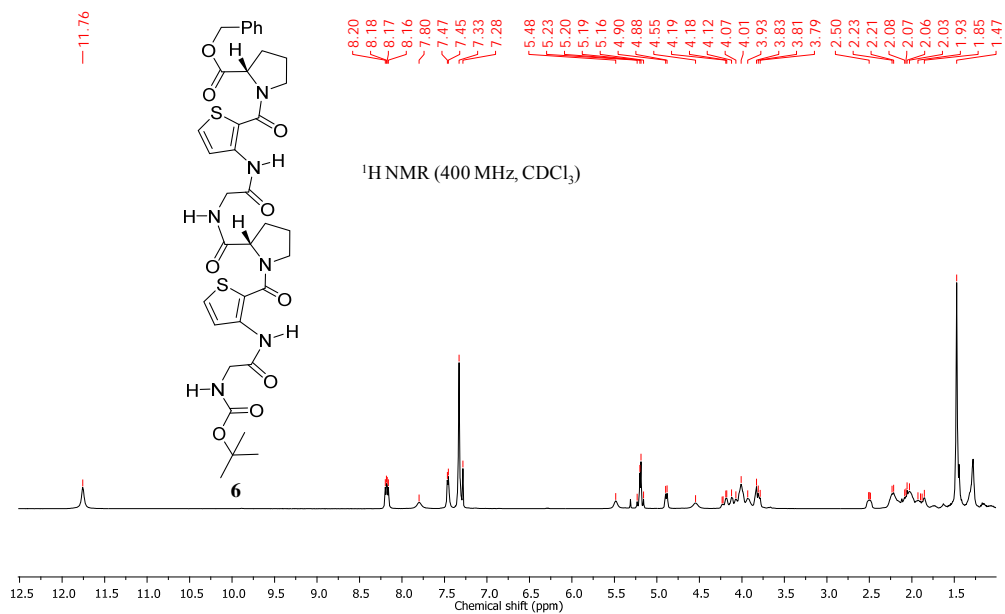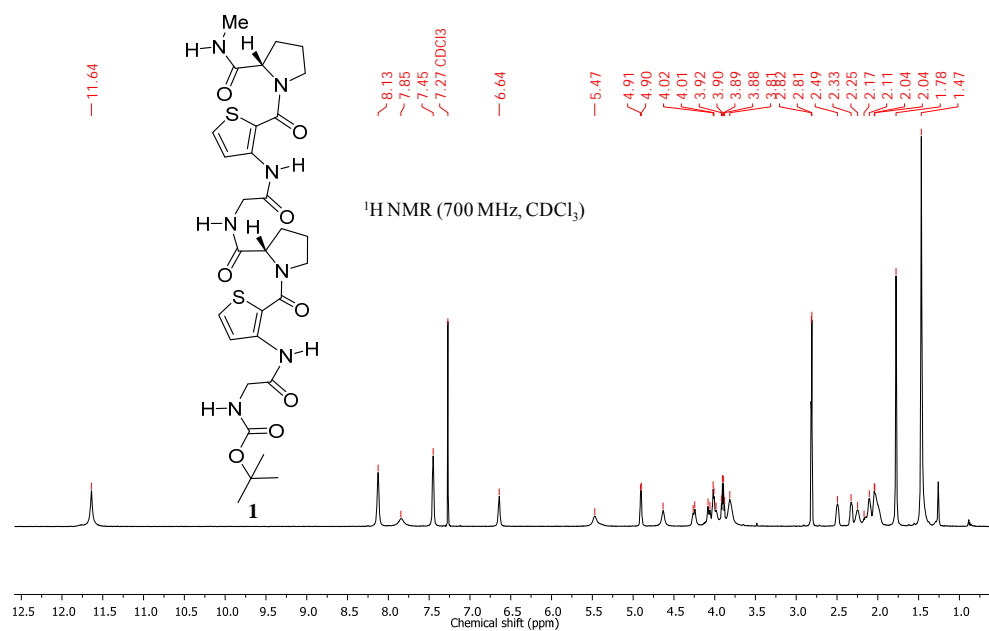

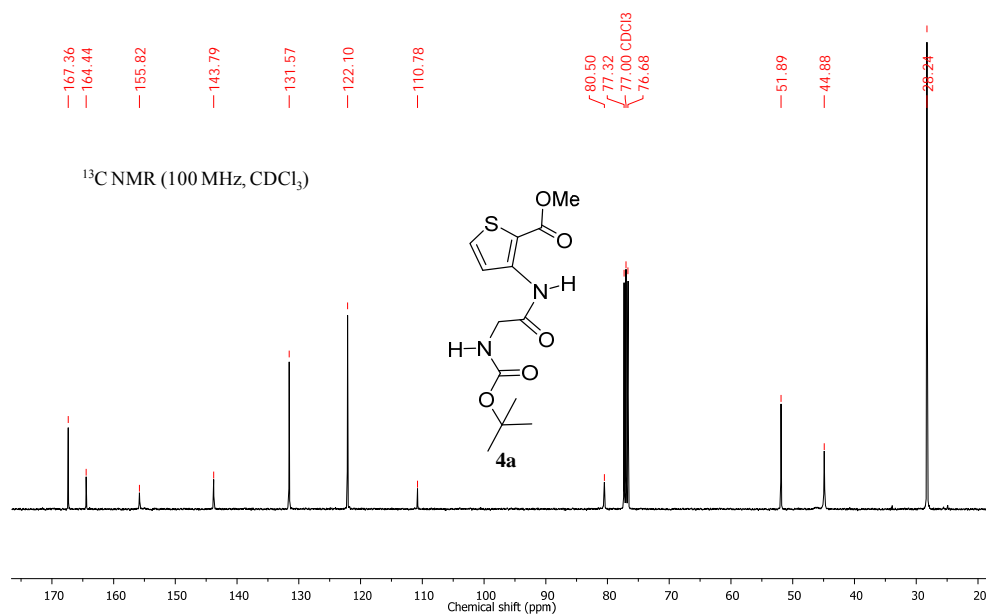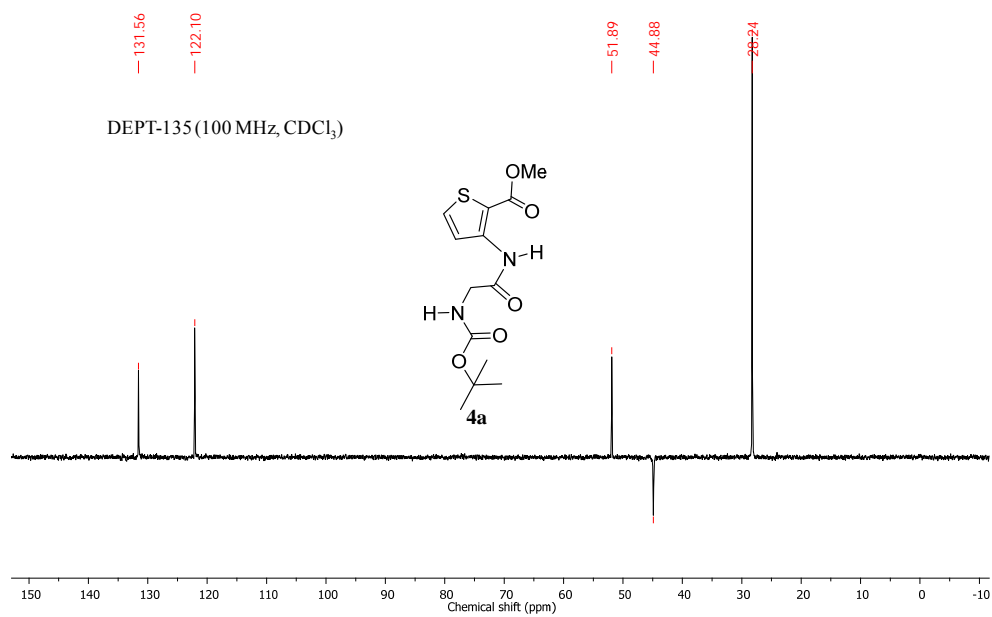

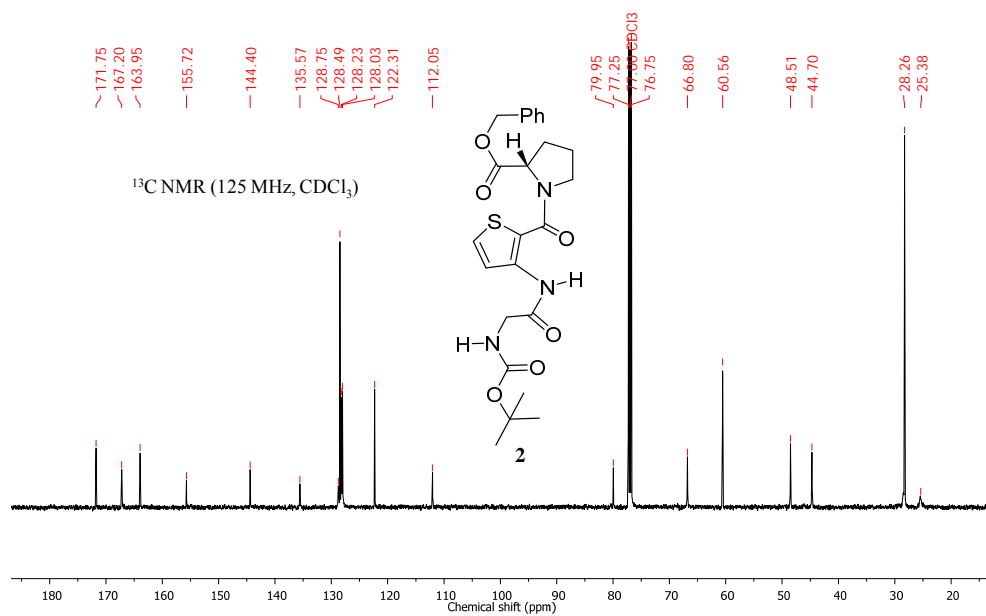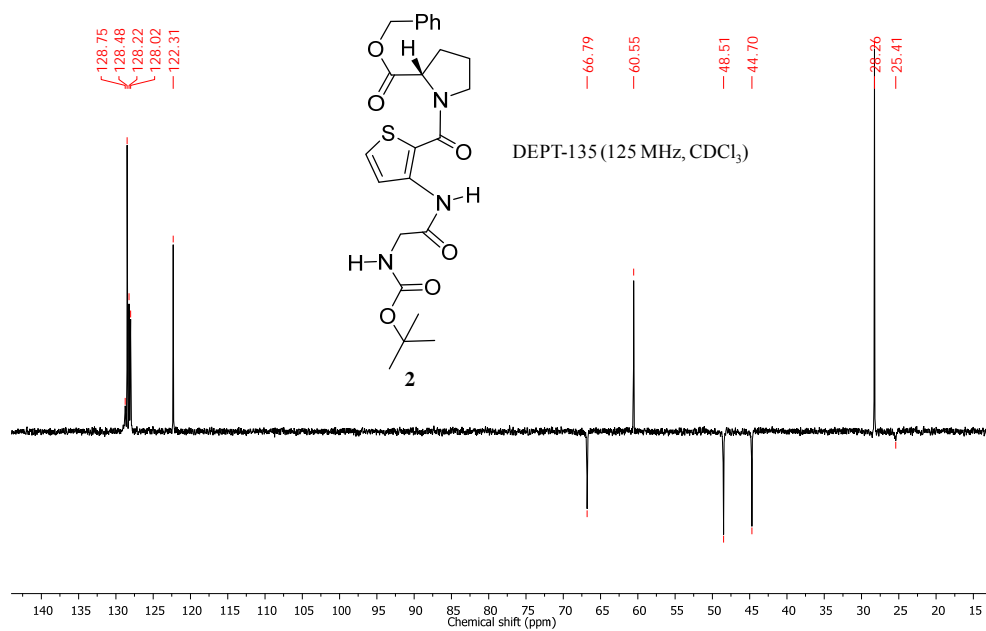

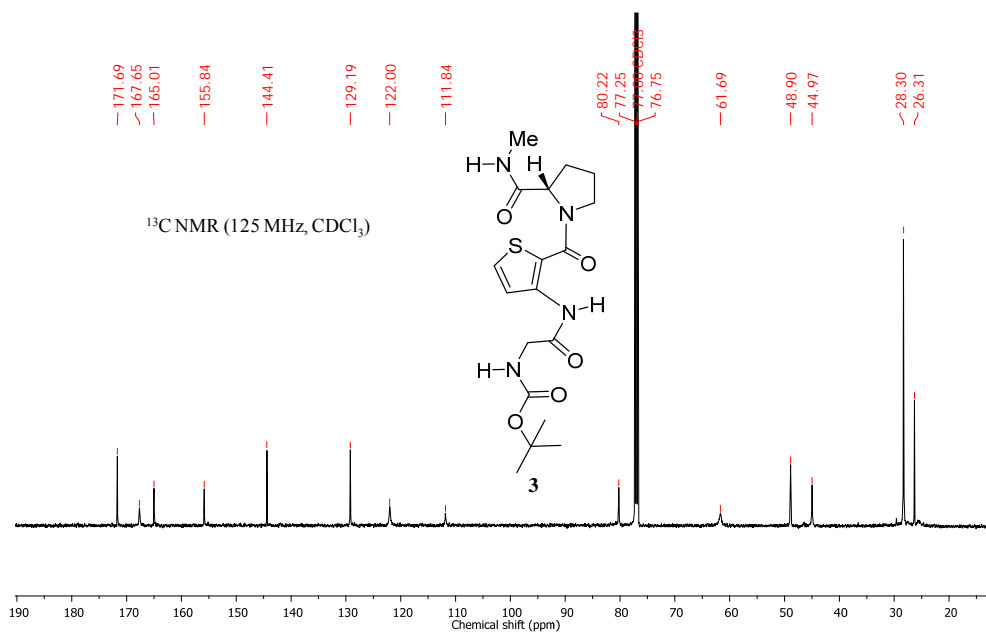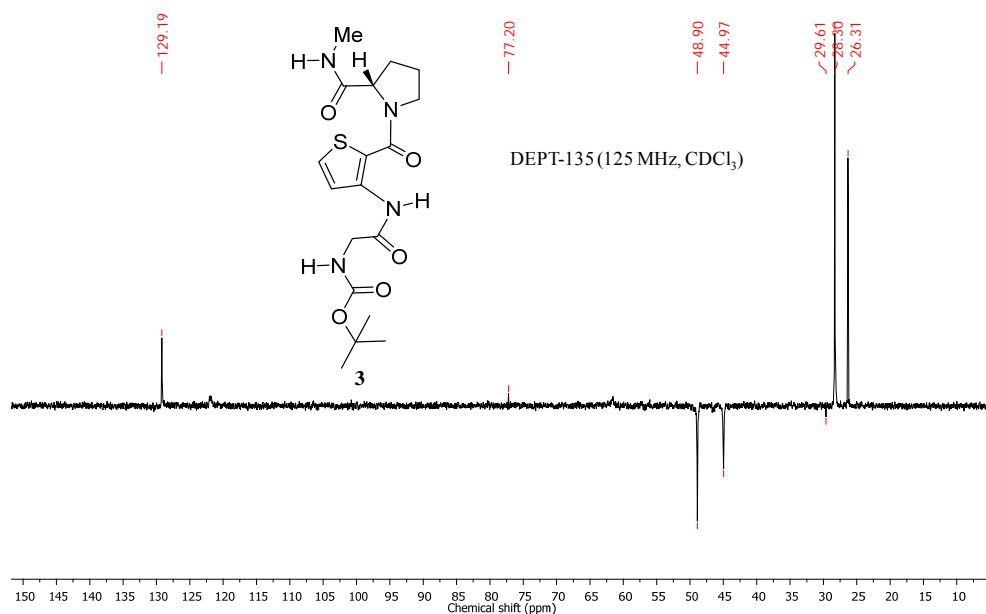

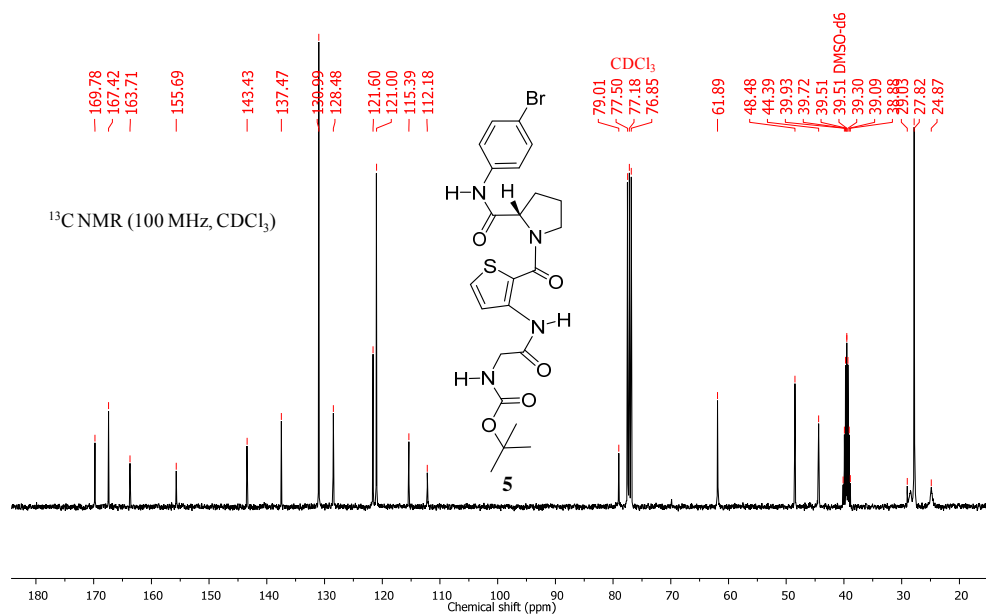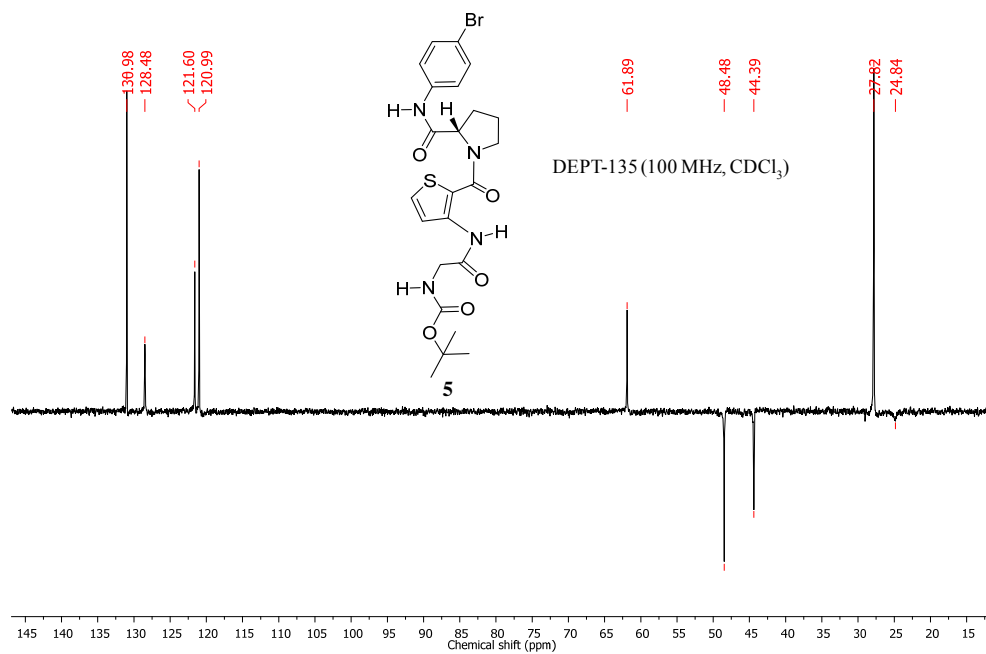

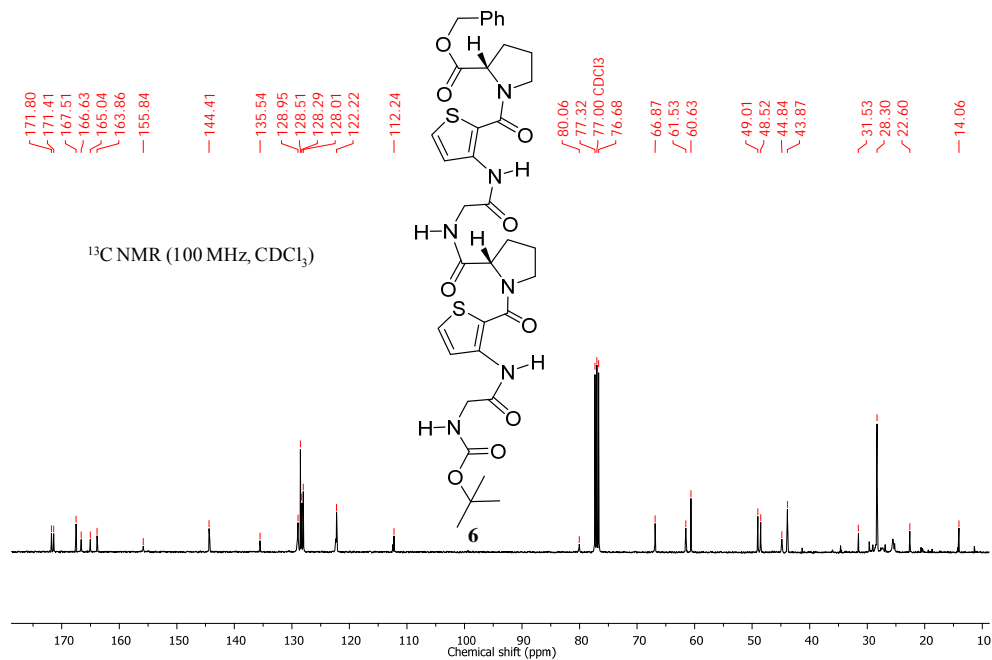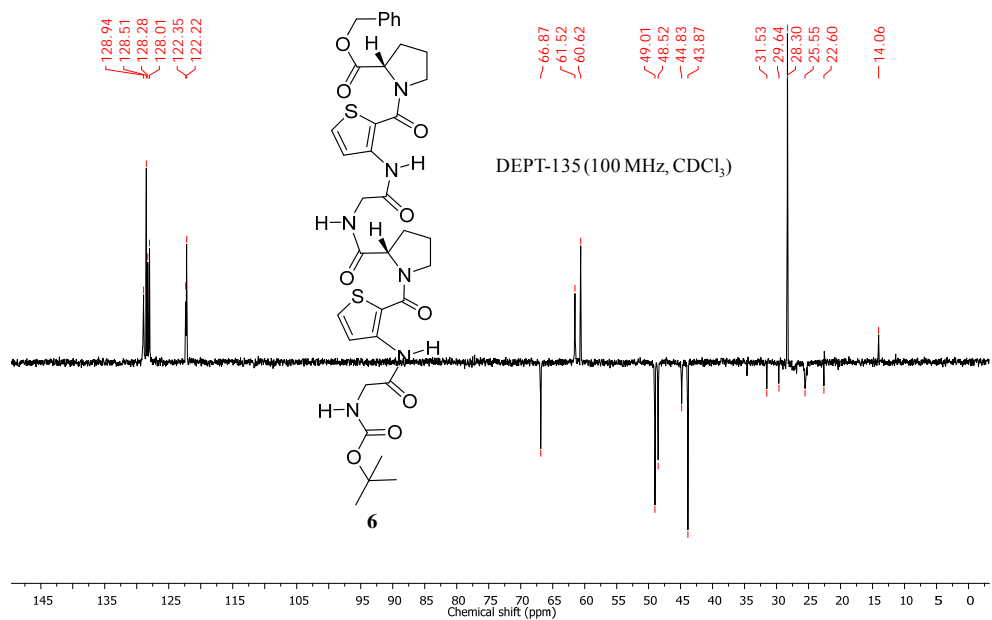

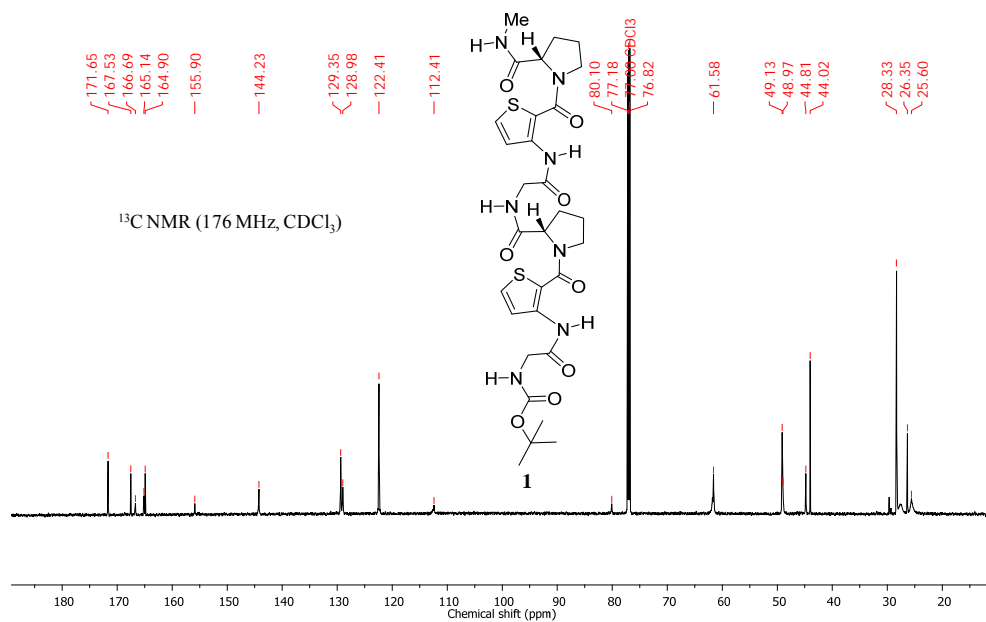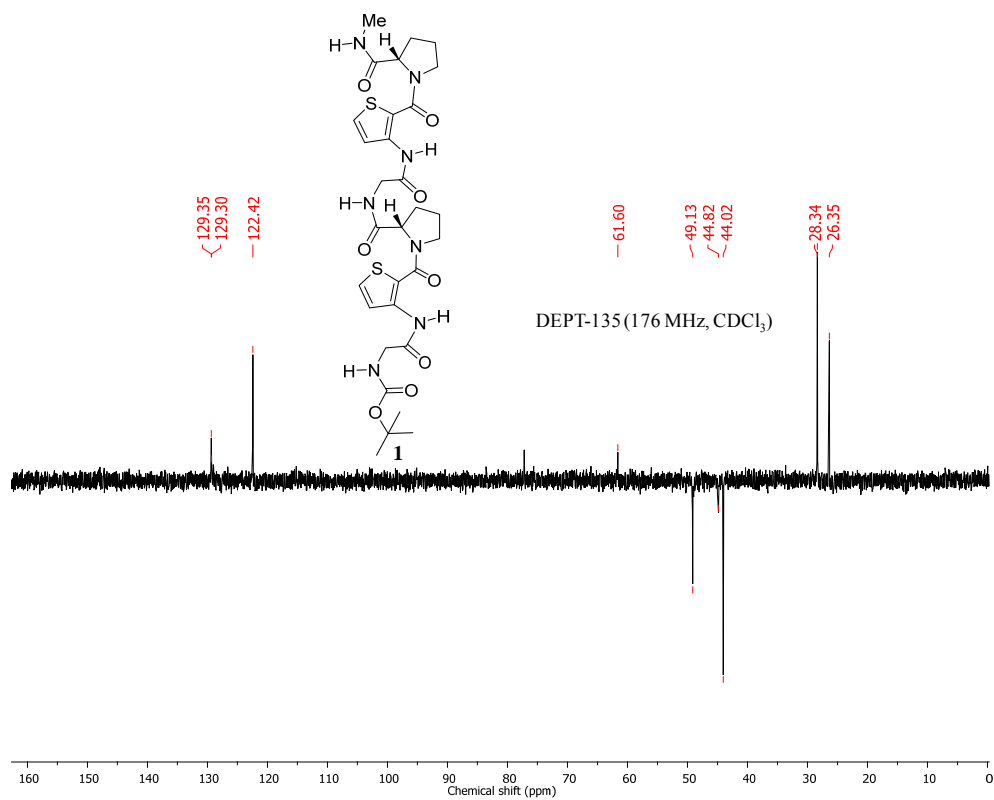

**Table S1. Titration study of 2 in CDCl<sub>3</sub> (5 mM, 400 MHz) with DMSO-*d*<sub>6</sub> (Volume of DMSO- *d*<sub>6</sub> added at each addition = 5 μL)**

| No | Volume of DMSO- <i>d</i> <sub>6</sub> (μL) | Chemical Shift δ (ppm) |       |
|----|--------------------------------------------|------------------------|-------|
|    |                                            | NH1                    | NH2   |
| 1  | 0                                          | 5.15                   | 11.69 |
| 2  | 5                                          | 5.2                    | 11.68 |
| 3  | 10                                         | 5.25                   | 11.67 |
| 4  | 15                                         | 5.3                    | 11.66 |
| 5  | 20                                         | 5.38                   | 11.64 |
| 6  | 25                                         | 5.43                   | 11.64 |
| 7  | 30                                         | 5.48                   | 11.62 |
| 8  | 35                                         | 5.54                   | 11.61 |
| 9  | 40                                         | 5.6                    | 11.6  |
| 10 | 45                                         | 5.65                   | 11.59 |
| 11 | 50                                         | 5.7                    | 11.58 |

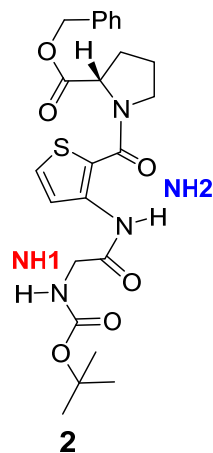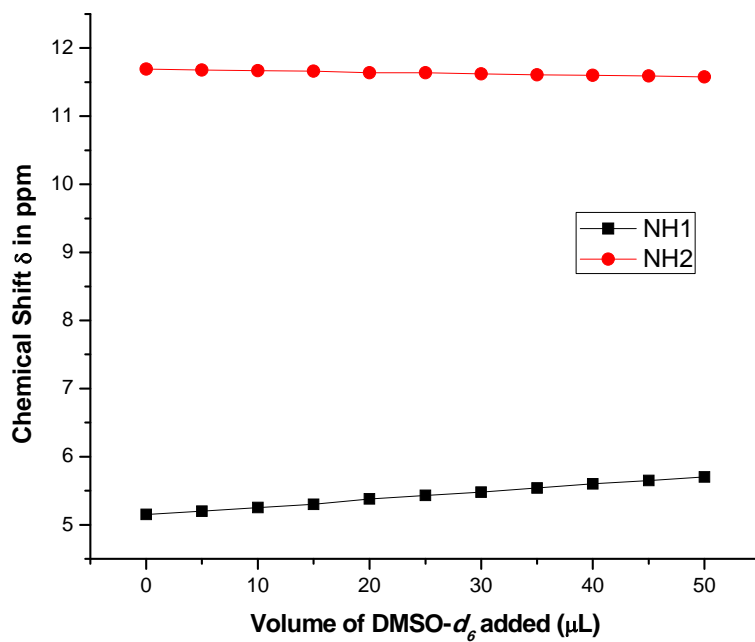

**Table S2. Titration study of 3 in CDCl<sub>3</sub> (5 mM, 400 MHz) with DMSO-*d*<sub>6</sub> (Volume of DMSO- *d*<sub>6</sub> added at each addition = 5 μL)**

| No | Volume of DMSO- <i>d</i> <sub>6</sub> (μL) | Chemical Shift δ (ppm) |       |      |
|----|--------------------------------------------|------------------------|-------|------|
|    |                                            | NH1                    | NH2   | NH3  |
| 1  | 0                                          | 5.2                    | 11.77 | 6.69 |
| 2  | 5                                          | 5.27                   | 11.75 | 6.72 |
| 3  | 10                                         | 5.32                   | 11.75 | 6.75 |
| 4  | 15                                         | 5.42                   | 11.73 | 6.8  |
| 5  | 20                                         | 5.48                   | 11.71 | 6.83 |
| 6  | 25                                         | 5.57                   | 11.69 | 6.87 |
| 7  | 30                                         | 5.63                   | 11.68 | 6.9  |
| 8  | 35                                         | 5.7                    | 11.66 | 6.93 |
| 9  | 40                                         | 5.74                   | 11.65 | 6.95 |
| 10 | 45                                         | 5.81                   | 11.63 | 6.97 |
| 11 | 50                                         | 5.84                   | 11.62 | 6.99 |

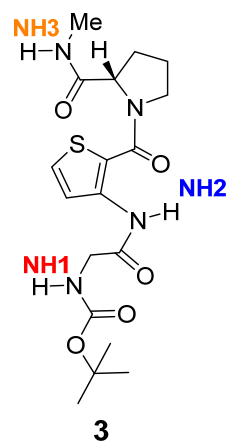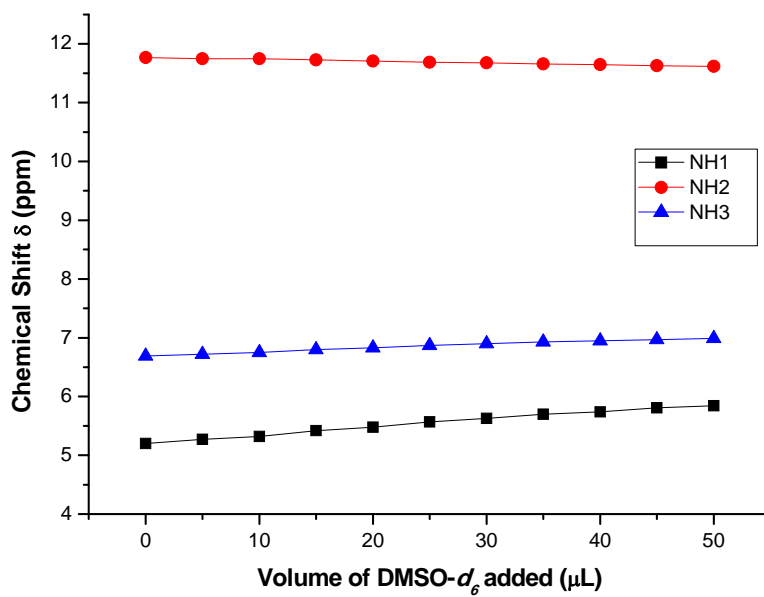

**Table S3. Titration study of 1 in CDCl<sub>3</sub> (5 mM, 400 MHz) with DMSO-*d*<sub>6</sub> (Volume of DMSO- *d*<sub>6</sub> added at each addition = 5 μL)**

| No | Volume of DMSO- <i>d</i> <sub>6</sub> (μL) | Chemical Shift δ (ppm) |       |      |       |      |
|----|--------------------------------------------|------------------------|-------|------|-------|------|
|    |                                            | NH1                    | NH2   | NH3  | NH4   | NH5  |
| 1  | 0                                          | 5.43                   | 11.69 | 7.85 | 11.69 | 6.58 |
| 2  | 5                                          | 5.48                   | 11.66 | 7.85 | 11.66 | 6.66 |
| 3  | 10                                         | 5.53                   | 11.63 | 7.87 | 11.63 | 6.72 |
| 4  | 15                                         | 5.59                   | 11.6  | 7.87 | 11.6  | 6.78 |
| 5  | 20                                         | 5.62                   | 11.59 | 7.87 | 11.59 | 6.82 |
| 6  | 25                                         | 5.68                   | 11.56 | 7.88 | 11.58 | 6.86 |
| 7  | 30                                         | 5.72                   | 11.54 | 7.88 | 11.57 | 6.89 |
| 8  | 35                                         | 5.75                   | 11.52 | 7.88 | 11.56 | 6.93 |
| 9  | 40                                         | 5.81                   | 11.5  | 7.89 | 11.54 | 6.95 |
| 10 | 45                                         | 5.84                   | 11.49 | 7.89 | 11.53 | 6.98 |
| 11 | 50                                         | 5.87                   | 11.47 | 7.89 | 11.52 | 7    |

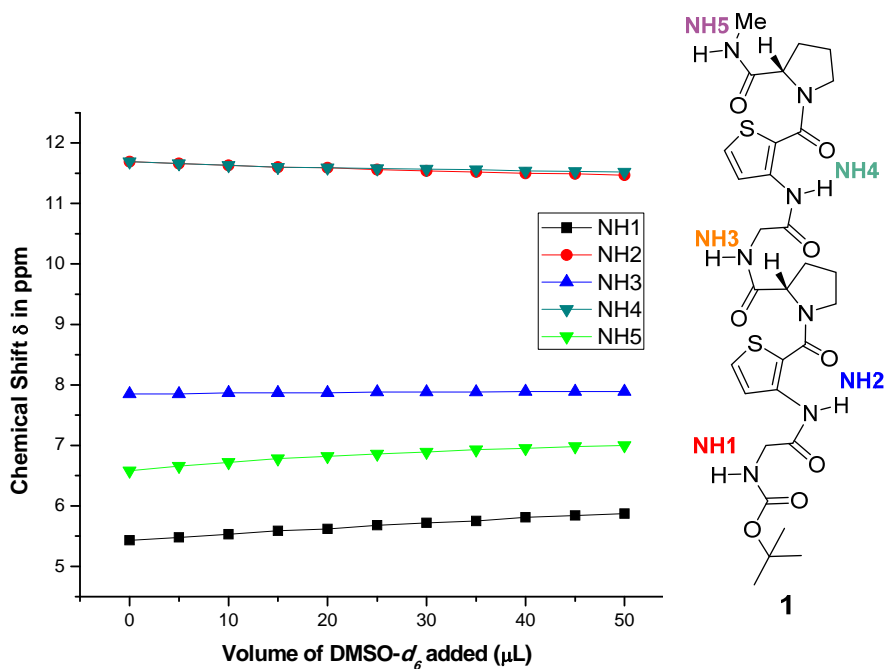

**Table S4. Variable temperature study of 2 (5 mM, 400 MHz, CDCl<sub>3</sub>)**

| No | Temperature (K) | Chemical Shift $\delta$ in ppm |       |
|----|-----------------|--------------------------------|-------|
|    |                 | NH1                            | NH2   |
| 1  | 268             | 5.19                           | 11.78 |
| 2  | 273             | 5.18                           | 11.76 |
| 3  | 278             | 5.17                           | 11.75 |
| 4  | 283             | 5.16                           | 11.74 |
| 5  | 288             | 5.15                           | 11.72 |
| 6  | 293             | 5.15                           | 11.71 |
| 7  | 298             | 5.14                           | 11.69 |
| 8  | 303             | 5.13                           | 11.68 |
| 9  | 308             | 5.13                           | 11.66 |
| 10 | 313             | 5.12                           | 11.65 |
| 11 | 318             | 5.1                            | 11.63 |
| 12 | 323             | 5.09                           | 11.62 |

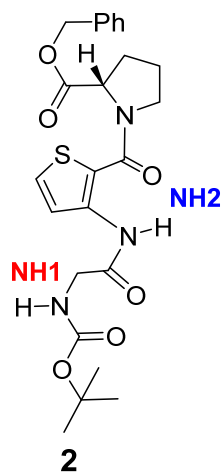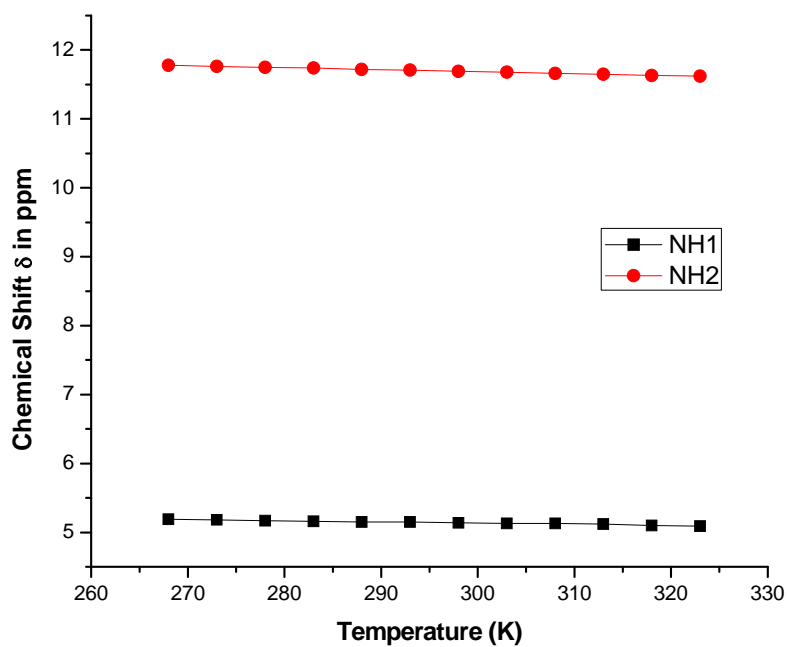

**Table S5. Variable temperature study of 3 (5 mM, 400 MHz, CDCl<sub>3</sub>)**

| No | Temperature (K) | Chemical Shift $\delta$ in ppm |       |      |
|----|-----------------|--------------------------------|-------|------|
|    |                 | NH1                            | NH2   | NH3  |
| 1  | 268             | 5.25                           | 11.88 | 6.79 |
| 2  | 273             | 5.25                           | 11.87 | 6.78 |
| 3  | 278             | 5.24                           | 11.85 | 6.76 |
| 4  | 283             | 5.24                           | 11.83 | 6.74 |
| 5  | 288             | 5.23                           | 11.81 | 6.72 |
| 6  | 293             | 5.22                           | 11.8  | 6.71 |
| 7  | 298             | 5.2                            | 11.77 | 6.69 |
| 8  | 303             | 5.19                           | 11.76 | 6.67 |
| 9  | 308             | 5.18                           | 11.74 | 6.65 |
| 10 | 313             | 5.18                           | 11.73 | 6.64 |
| 11 | 318             | 5.15                           | 11.71 | 6.63 |
| 12 | 323             | 5.14                           | 11.69 | 6.61 |

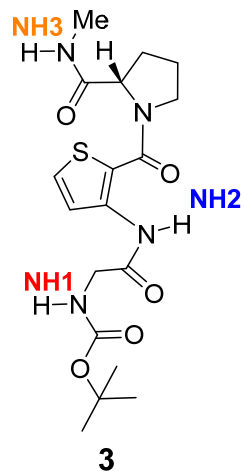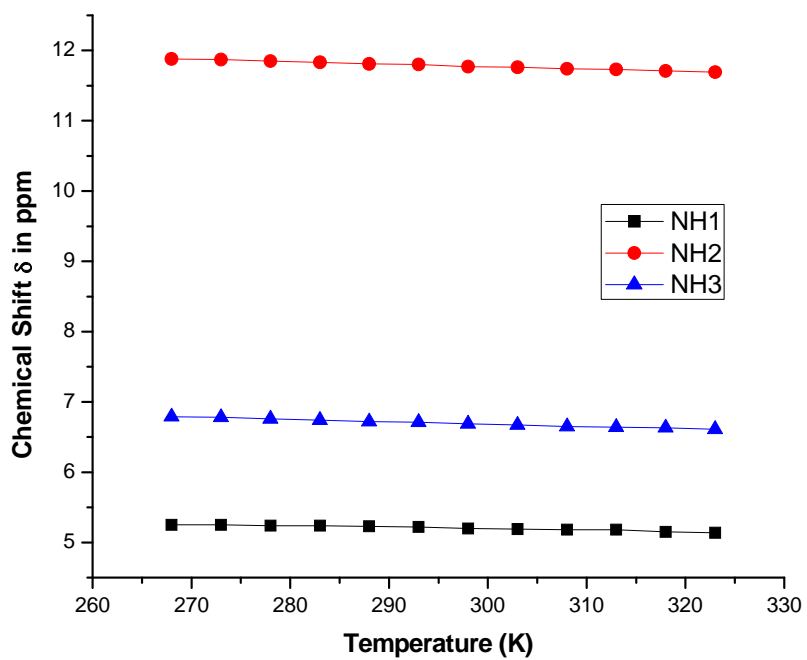

**Table S6. Variable temperature study of 1 (5 mM, 400 MHz, CDCl<sub>3</sub>)**

| No | Temperature (K) | Chemical Shift $\delta$ in ppm |       |      |       |      |
|----|-----------------|--------------------------------|-------|------|-------|------|
|    |                 | NH1                            | NH2   | NH3  | NH4   | NH5  |
| 1  | 268             | 5.62                           | 11.75 | 8.01 | 11.84 | 6.66 |
| 2  | 273             | 5.58                           | 11.75 | 7.98 | 11.81 | 6.65 |
| 3  | 278             | 5.56                           | 11.74 | 7.96 | 11.79 | 6.64 |
| 4  | 283             | 5.53                           | 11.73 | 7.94 | 11.73 | 6.62 |
| 5  | 288             | 5.48                           | 11.72 | 7.92 | 11.72 | 6.6  |
| 6  | 293             | 5.46                           | 11.71 | 7.88 | 11.71 | 6.59 |
| 7  | 298             | 5.43                           | 11.69 | 7.85 | 11.69 | 6.57 |
| 8  | 303             | 5.4                            | 11.66 | 7.82 | 11.67 | 6.57 |
| 9  | 308             | 5.38                           | 11.64 | 7.79 | 11.66 | 6.56 |
| 10 | 313             | 5.37                           | 11.62 | 7.77 | 11.64 | 6.54 |
| 11 | 318             | 5.34                           | 11.61 | 7.74 | 11.63 | 6.52 |
| 12 | 323             | 5.32                           | 11.59 | 7.71 | 11.61 | 6.52 |

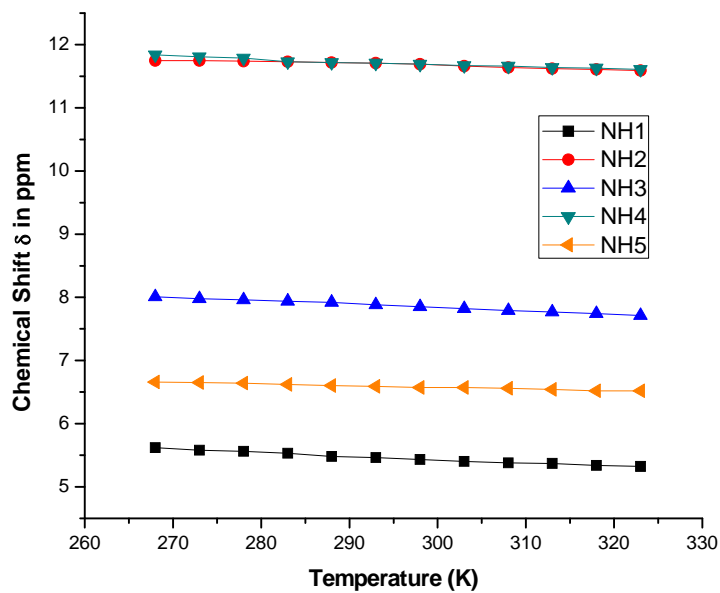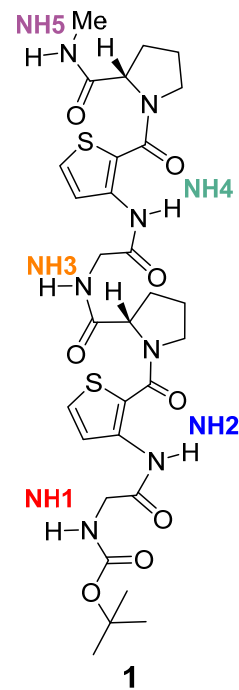

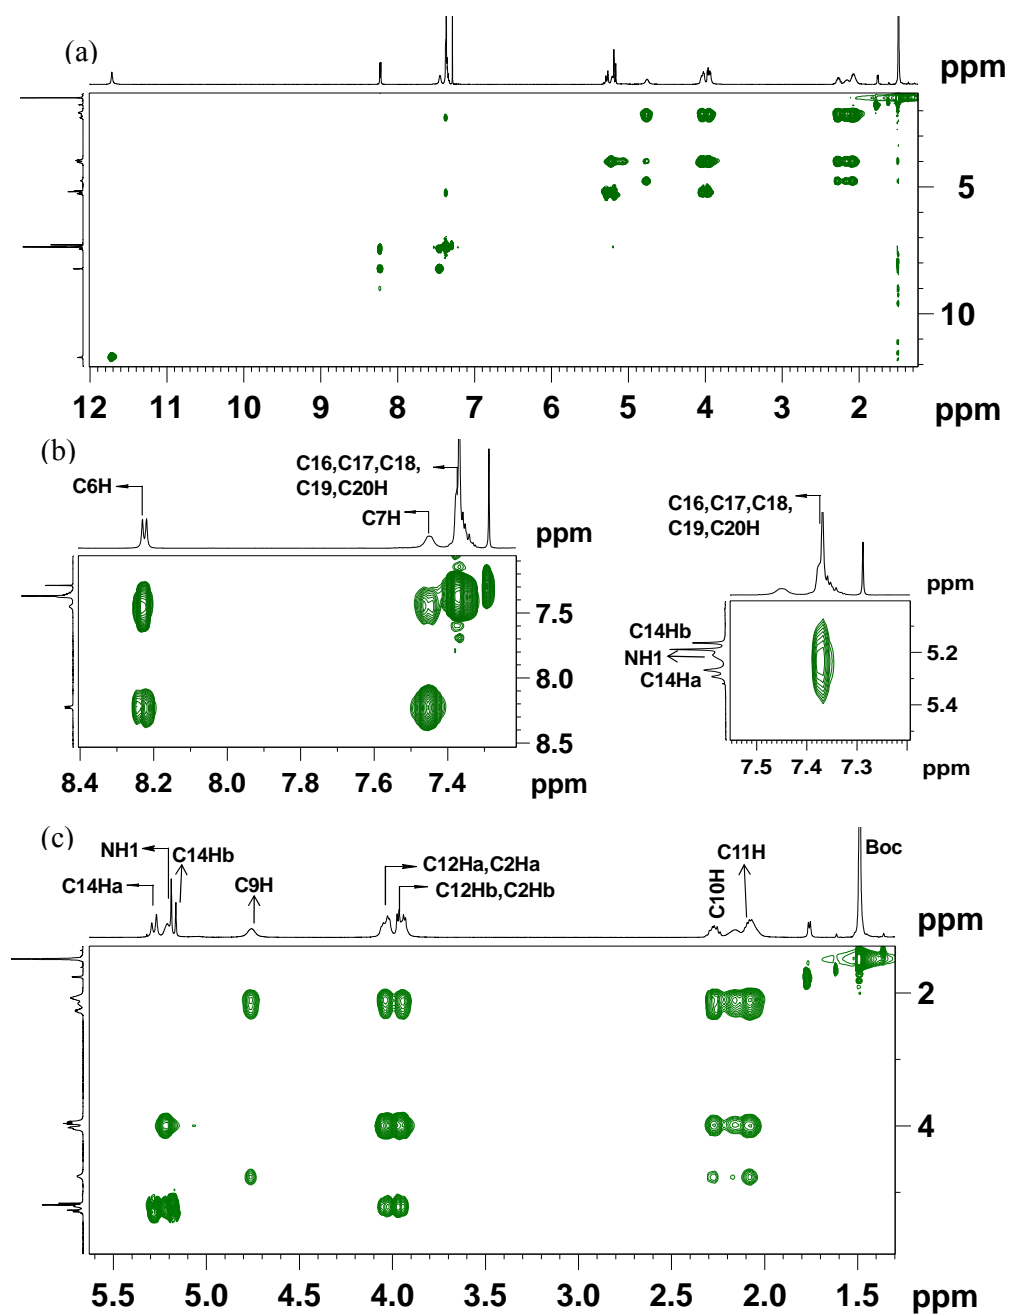

**Figure S1:** TOCSY full spectrum (a) of **2** (25 mM, 500 MHz, CDCl<sub>3</sub>, 298 K); aromatic (b) and aliphatic (c) regions shown separately.

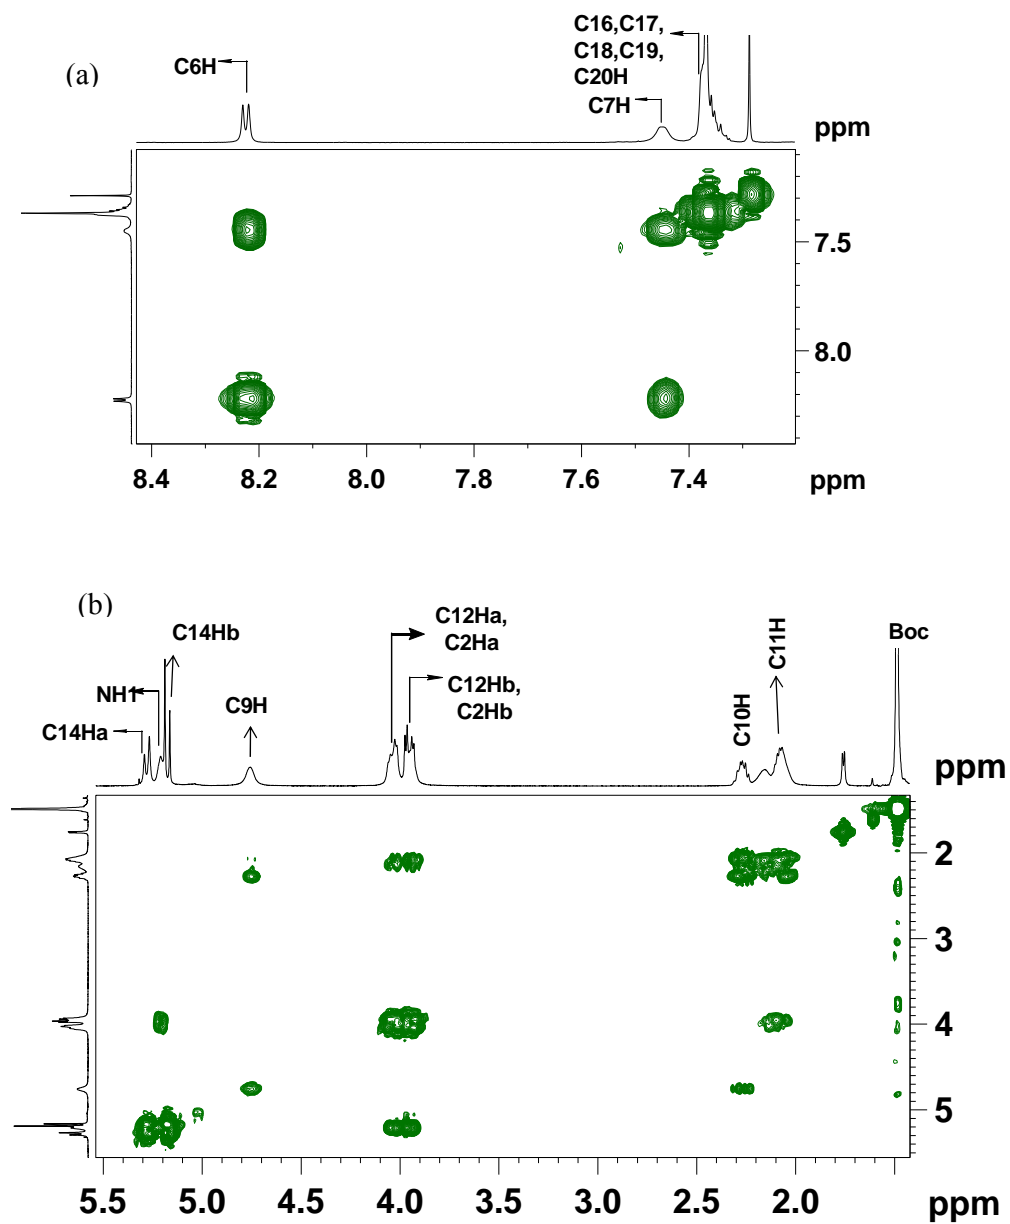

**Figure S2:** Partial COSY spectra of **2** (25 mM, 500 MHz, CDCl<sub>3</sub>, 298 K); aromatic (a) and aliphatic (b) regions shown separately.

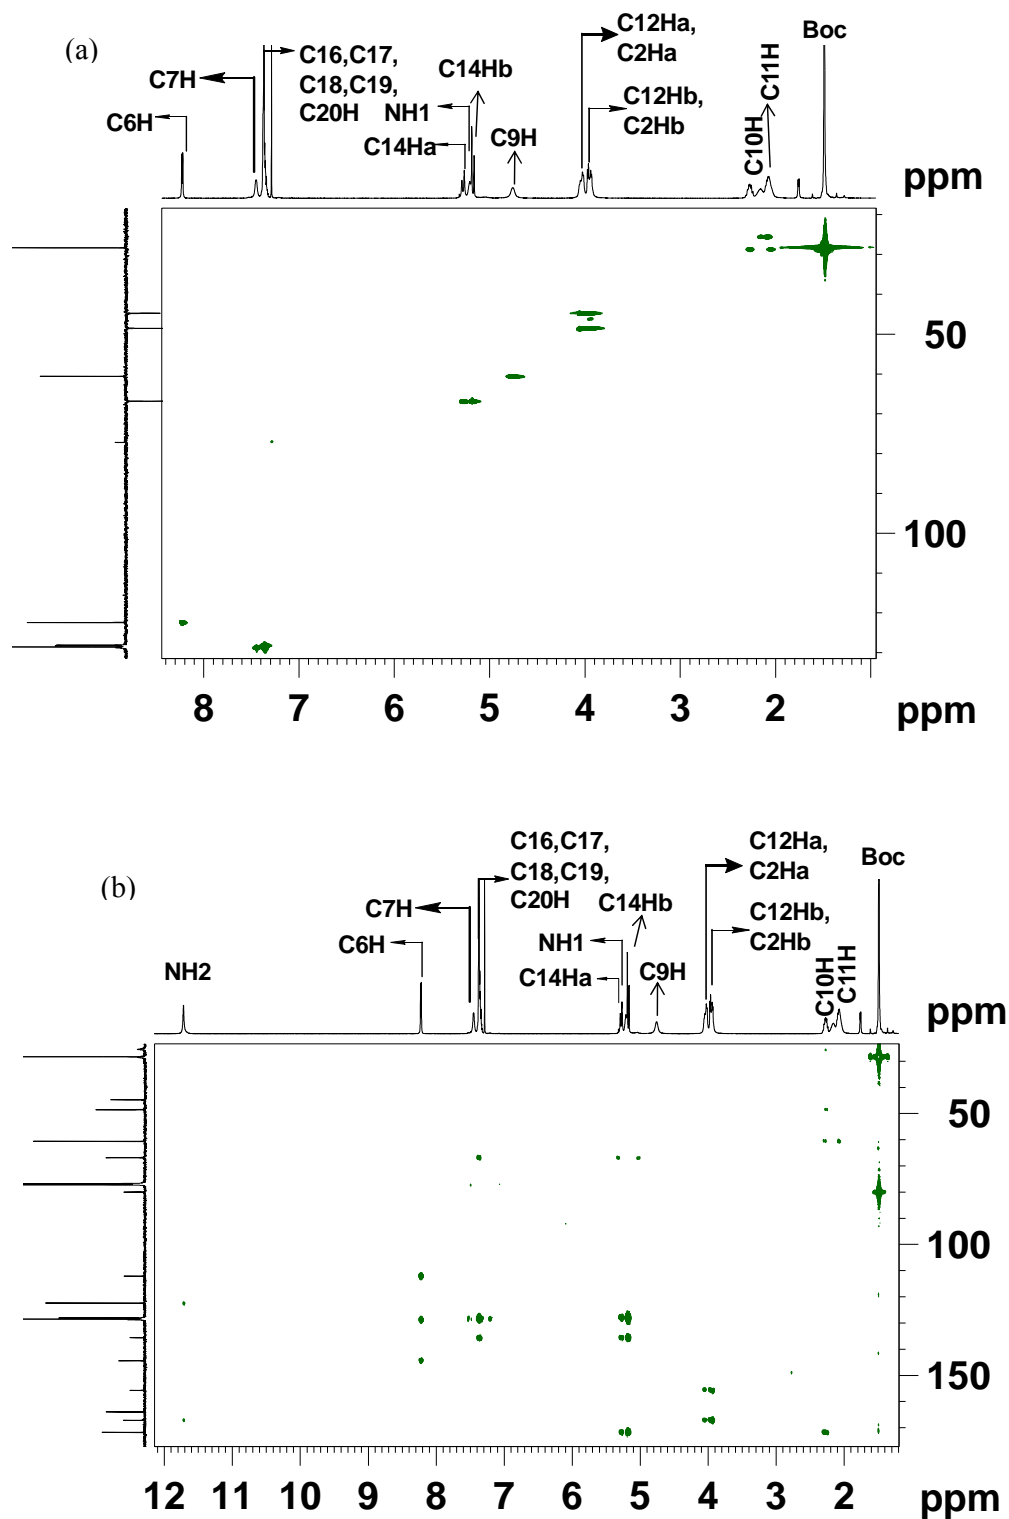

**Figure S3:** HSQC (a) and HMBC (b) full spectra of **2** (25 mM, 500 MHz,  $\text{CDCl}_3$ , 298 K).

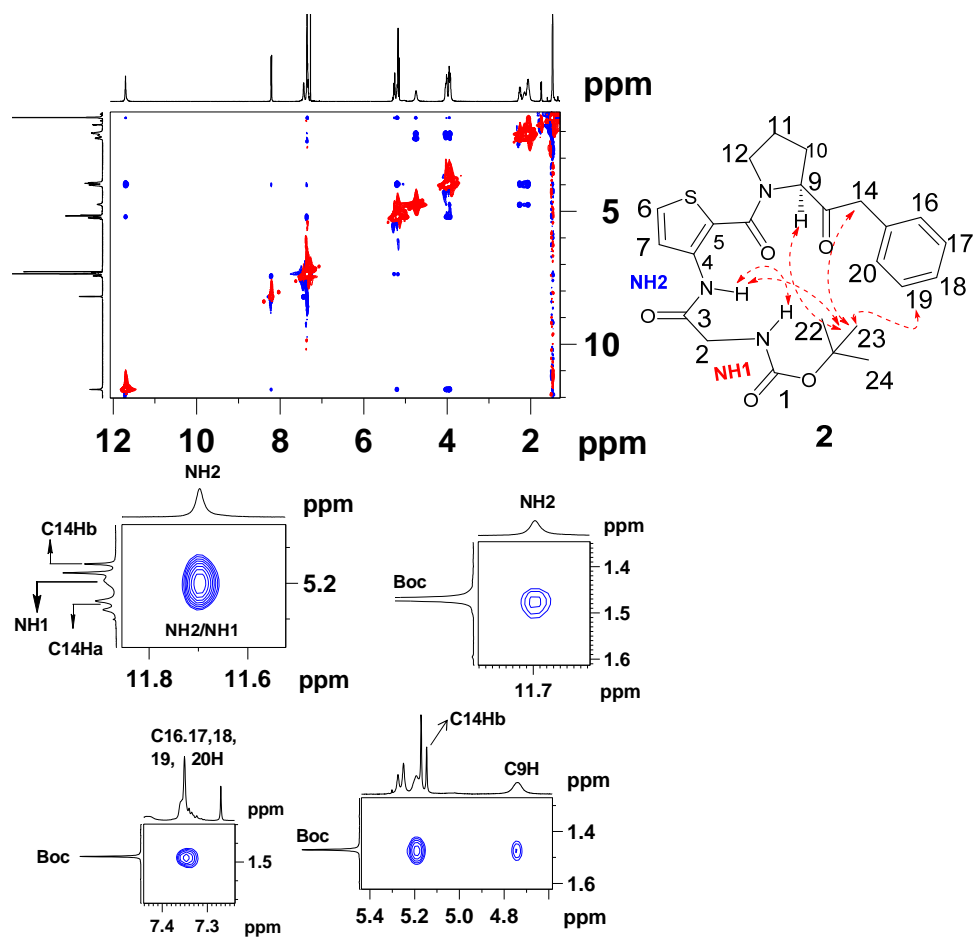

**Figure S4:** 2D NOESY full spectrum and excerpts of **2** (25 mM, 500 MHz, CDCl<sub>3</sub>, 298 K).

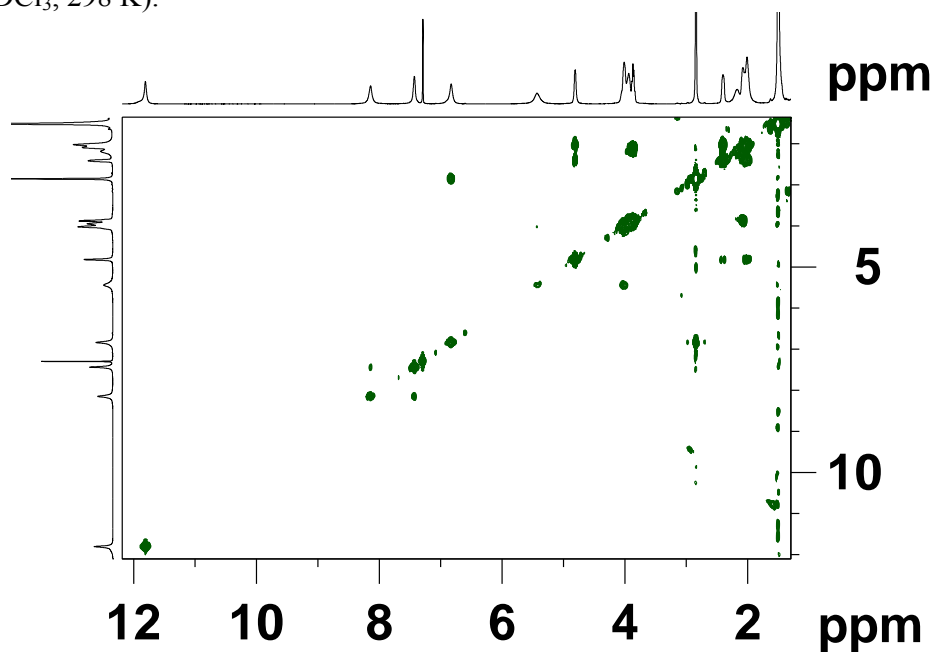

**Figure S5:** COSY full spectrum (a) of **3** (25 mM, 500 MHz, CDCl<sub>3</sub>, 298 K).

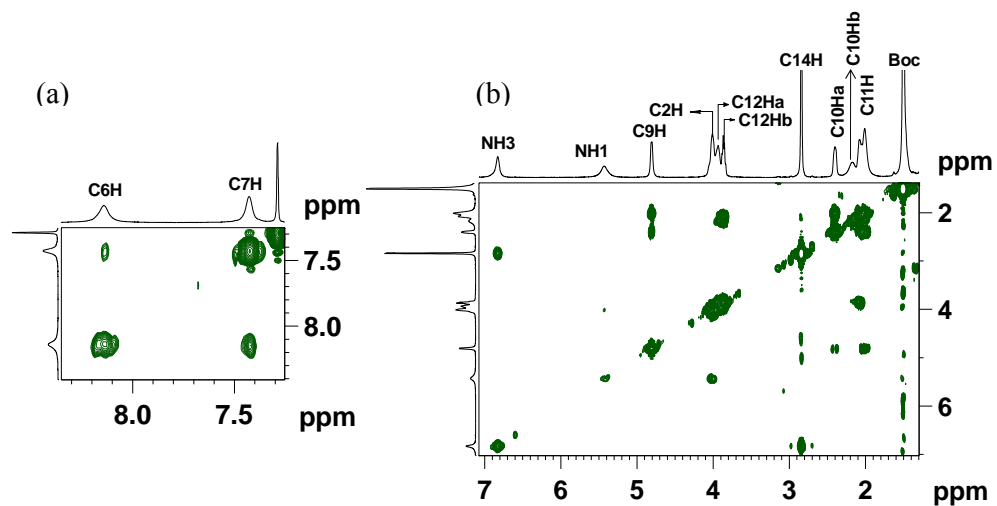

**Figure S6:** Partial COSY spectra of **3** (25 mM, 500 MHz,  $\text{CDCl}_3$ , 298 K); aromatic (a) and aliphatic (b) regions shown separately.

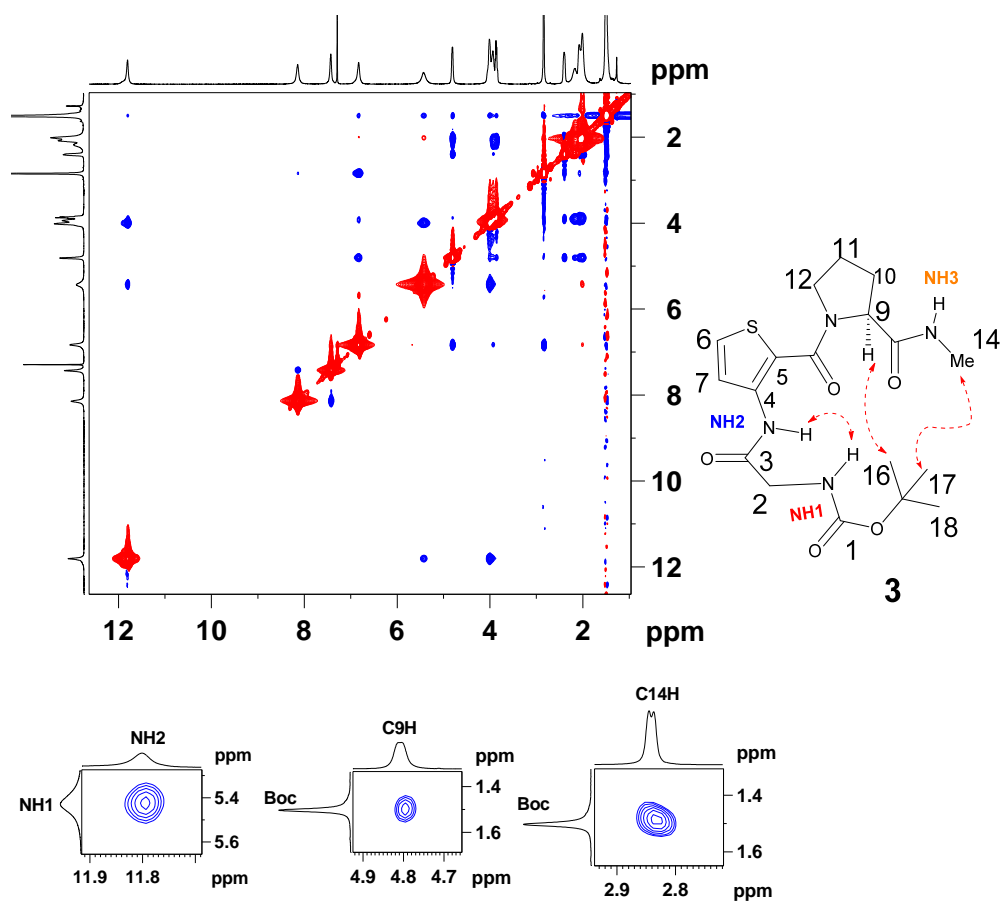

**Figure S7:** 2D NOESY full spectrum and excerpts of **3** (25 mM, 500 MHz,  $\text{CDCl}_3$ , 298 K).

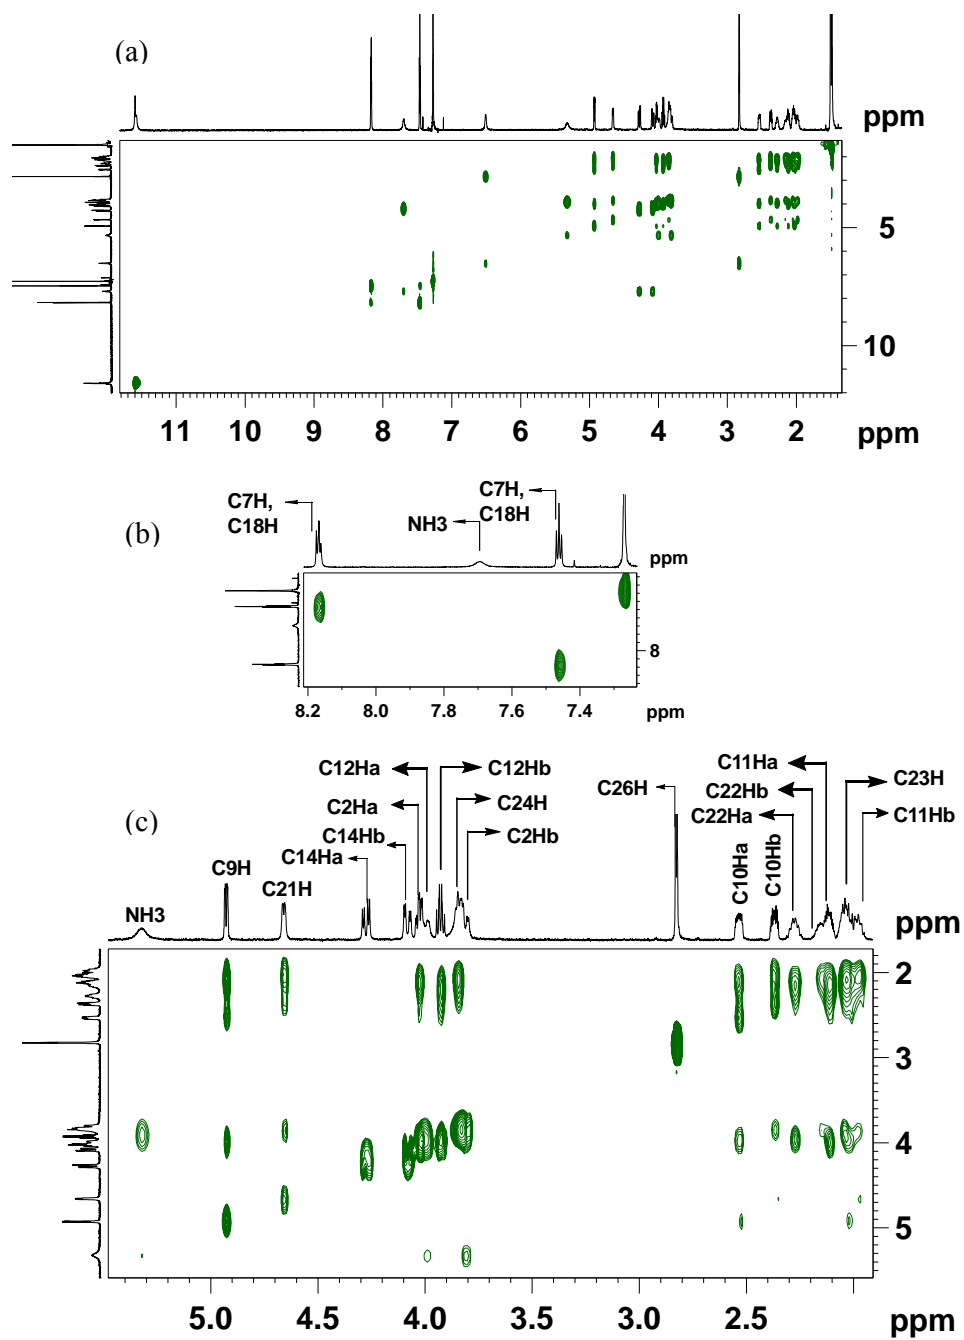

**Figure S8:** TOCSY full spectrum (a) of **1** (6 mM, 700 MHz, CDCl<sub>3</sub>, 328 K); aromatic (b) and aliphatic (c) regions shown separately.

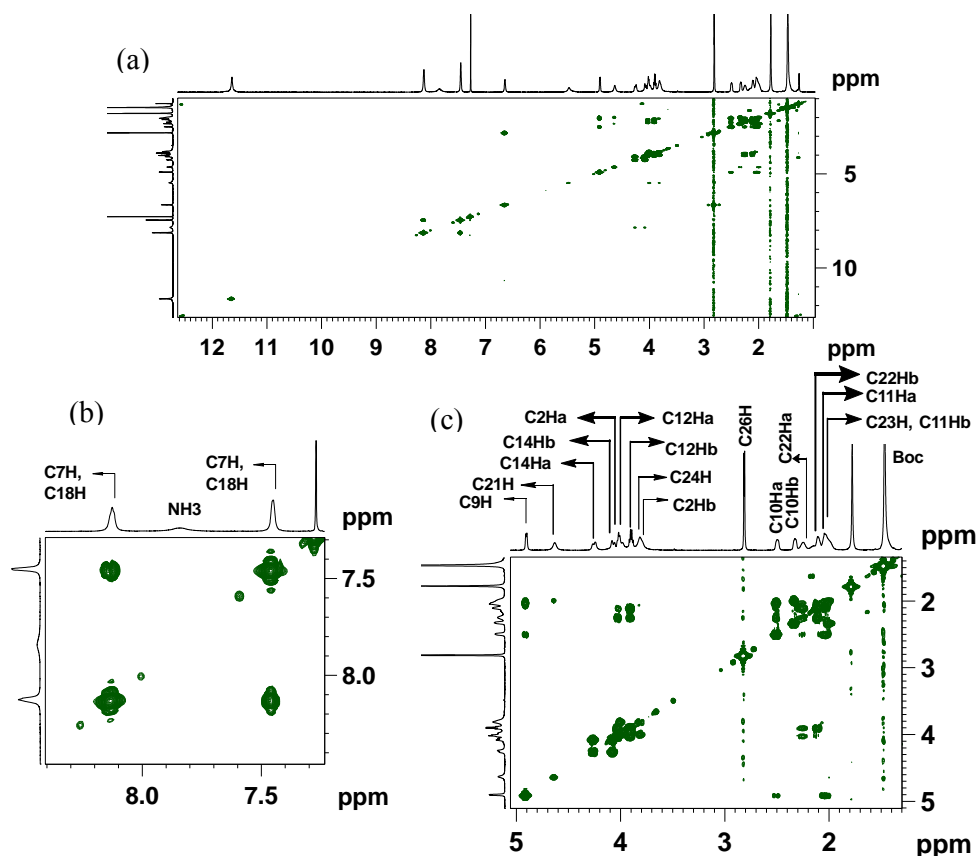

**Figure S9.** COSY full spectrum (a) of **1** (23 mM, 700 MHz, CDCl<sub>3</sub>, 298 K); aromatic (b) and aliphatic (c) regions shown separately.

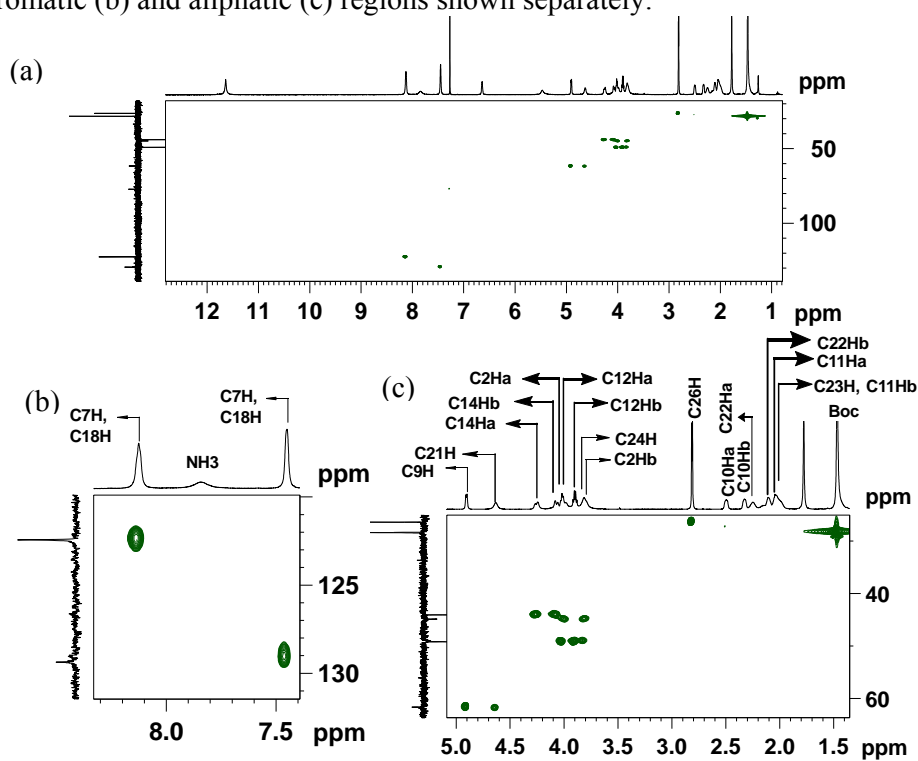

**Figure S10.** HSQC full spectrum (a) of **1** (23 mM, 700 MHz, CDCl<sub>3</sub>, 298 K); aromatic (b) and aliphatic (c) regions shown separately.

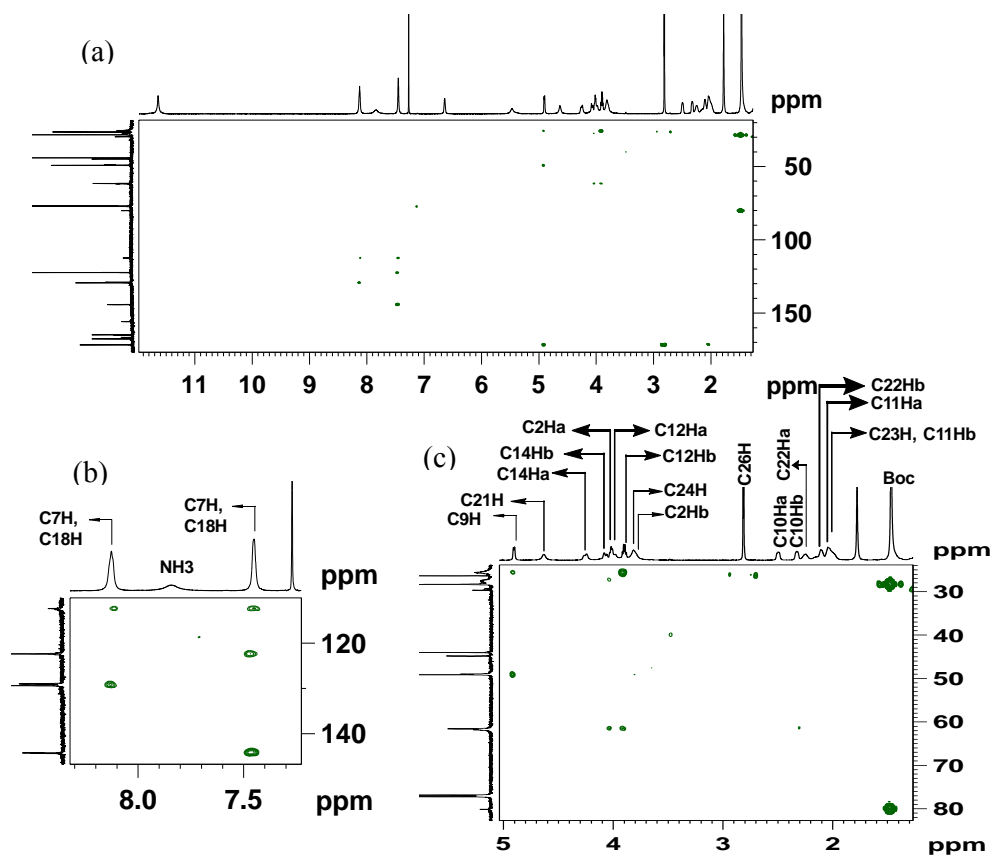

**Figure S11.** HMBC full spectrum (a) of **1** (23 mM, 700MHz, CDCl<sub>3</sub>, 298 K); aromatic (b) and aliphatic (c) regions shown separately.

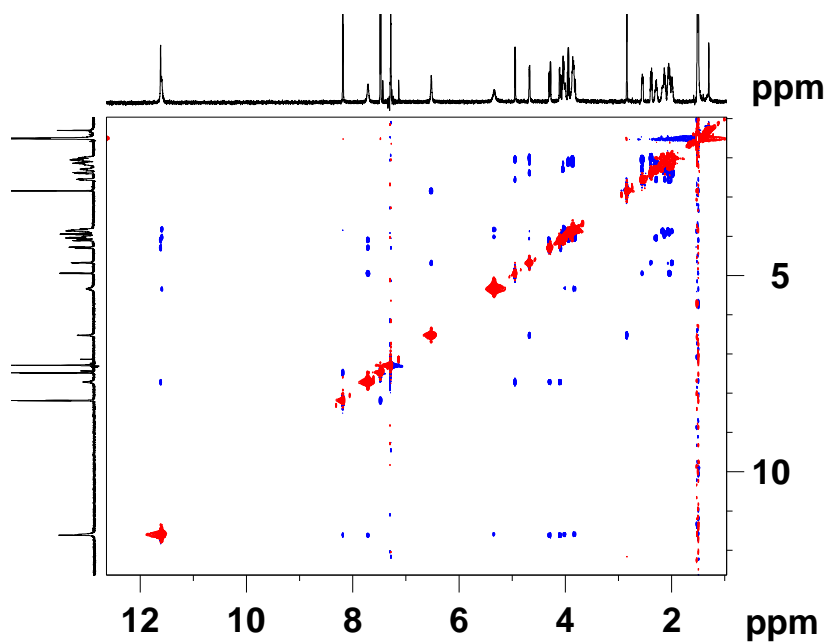

**Figure S12.** NOESY full spectrum of **1** (6 mM, 700MHz, CDCl<sub>3</sub>, 328 K).

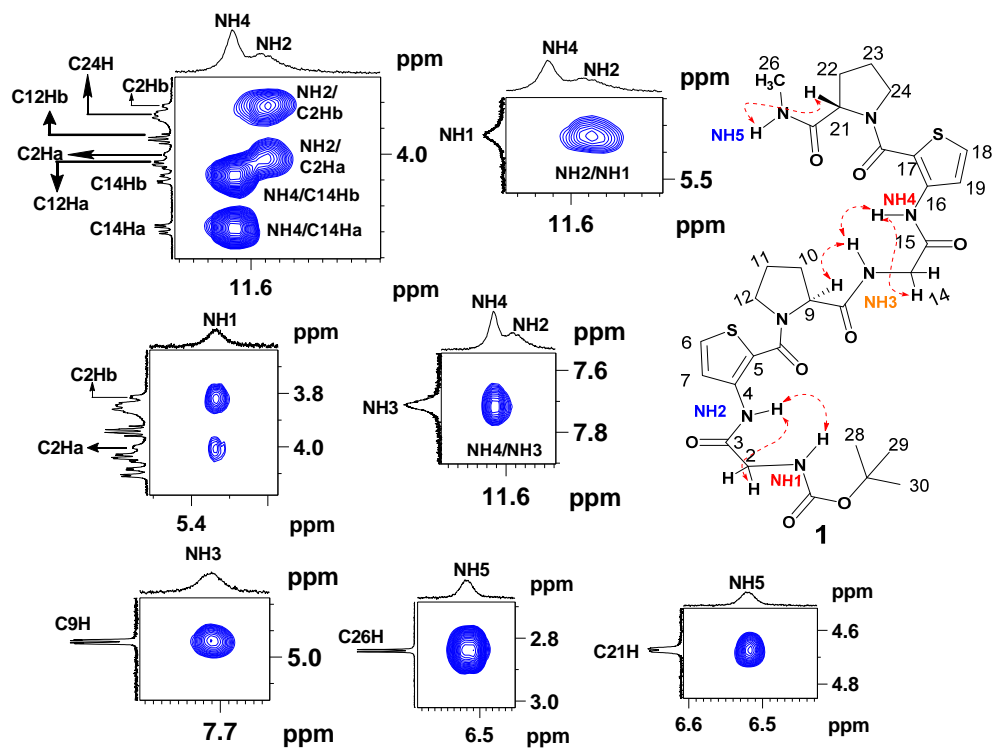

**Figure S13.** 2D NOESY extracts of **1** (6 mM, 700MHz, CDCl<sub>3</sub>, 328 K).

**X-ray Crystallography:** Single crystal structure of compound **2** was determined by measuring X-ray intensity data on a Bruker SMART APEX II single crystal X-ray CCD diffractometer having graphite-monochromatised (Mo-K $\alpha$  = 0.71073 Å) radiation. The X-ray generator was operated at 50 kV and 30 mA. A preliminary set of cell constants and an orientation matrix were calculated from total 36 frames. The optimized strategy used for data collection consisted different sets of  $\varphi$  and  $\omega$  scans with 0.5° steps in  $\varphi/\omega$ . Data were collected keeping the sample-to-detector distance fixed at 5.00 cm. The X-ray data acquisition was monitored by APEX2 program suit. All the data were corrected for Lorentz-polarization and absorption effects using SAINT and SADABS programs integrated in APEX2 package. The structures were solved by direct methods and refined by full matrix least squares, based on  $F^2$ , using SHELX-97. Molecular diagrams were generated using ORTEP-3 and Mercury programs. Geometrical calculations were performed using SHELXTL and PLATON.

**Table 7:** X-ray crystallographic data of trimer **2**.

|                                    |                                                                 |
|------------------------------------|-----------------------------------------------------------------|
| Crystal Data                       | <b>2</b>                                                        |
| Formula                            | C <sub>24</sub> H <sub>29</sub> N <sub>3</sub> O <sub>6</sub> S |
| M <sub>r</sub>                     | 487.56                                                          |
| Crystal Size, mm                   | 0.32×0.25×0.10                                                  |
| Temp. (K)                          | 150(2)                                                          |
| Crystallizing solvent              | Ethyl acetate-petroleum ether                                   |
| Crystal Syst.                      | Orthorhombic                                                    |
| Space Group                        | $P2_12_12_1$                                                    |
| $a/\text{\AA}$                     | 8.8665(3)                                                       |
| $b/\text{\AA}$                     | 12.6487(5)                                                      |
| $c/\text{\AA}$                     | 21.9234(9)                                                      |
| $\alpha^\circ$                     | 90                                                              |
| $\beta^\circ$                      | 90                                                              |
| $\gamma^\circ$                     | 90                                                              |
| $V/\text{\AA}^3$                   | 2458.70(16)                                                     |
| Z                                  | 4                                                               |
| $D_{\text{calc}}/\text{g cm}^{-3}$ | 1.317                                                           |
| $\mu/\text{mm}^{-1}$               | 0.176                                                           |
| $F(000)$                           | 1032                                                            |
| <i>Ab. Correct.</i>                | multi-scan                                                      |
| $2\theta_{\text{max}}$             | 50                                                              |
| Total reflns.                      | 41420                                                           |
| unique reflns.                     | 4322                                                            |
| $h, k, l$ (min, max)               | (-10,10),(-15,15),(-23,26)                                      |
| R <sub>int</sub>                   | 0.0292                                                          |

|                                                                 |               |
|-----------------------------------------------------------------|---------------|
| No. of para                                                     | 311           |
| $R1$ [ $I > 2\sigma(I)$ ]                                       | 0.0315        |
| $wR2$ [ $I > 2\sigma(I)$ ]                                      | 0.0793        |
| $R1$ [all data]                                                 | 0.0330        |
| $wR2$ [all data]                                                | 0.0801        |
| goodness-of-fit                                                 | 1.067         |
| $\Delta\rho_{\max}, \Delta\rho_{\min}(\text{e}\text{\AA}^{-3})$ | 0.218, -0.177 |
| CCDC no.                                                        | 1435889       |

**Table 8:** nOe-derived distance constraints used in molecular modeling for structural elucidation of oligomer **1**.

| Atom I | Atom II | Chemical Shift I | Chemical Shift II | Upper Bound | Lower Bound |
|--------|---------|------------------|-------------------|-------------|-------------|
| C19H   | NH4     | 8.178            | 11.614            | 3.615       | 2.958       |
| NH3    | NH4     | 7.721            | 11.614            | 3.229       | 2.642       |
| NH1    | NH2     | 5.327            | 11.601            | 3.473       | 2.842       |
| C14Ha  | NH4     | 4.292            | 11.614            | 3.206       | 2.623       |
| C14Hb  | NH4     | 4.100            | 11.614            | 3.264       | 2.670       |
| C2Ha   | NH2     | 3.987            | 11.601            | 3.175       | 2.598       |
| C2Hb   | NH2     | 3.828            | 11.601            | 3.326       | 2.721       |
| C9H    | NH3     | 4.935            | 7.721             | 2.822       | 2.309       |
| C14Ha  | NH3     | 4.292            | 7.721             | 3.433       | 2.809       |
| C14Hb  | NH3     | 4.100            | 7.721             | 3.187       | 2.607       |
| C21H   | NH5     | 4.663            | 6.514             | 3.204       | 2.622       |
| C2Ha   | NH1     | 3.987            | 5.327             | 3.418       | 2.797       |
| C2Hb   | NH1     | 3.828            | 5.327             | 3.227       | 2.640       |
| C26H   | NH5     | 2.833            | 6.514             | 2.787       | 2.280       |
| C10Ha  | C9H     | 2.541            | 4.935             | 3.538       | 2.895       |
| C23H   | C21H    | 1.991            | 4.663             | 3.003       | 2.457       |
| Boc    | NH3     | 1.487            | 7.721             | 4.571       | 3.740       |
| Boc    | NH1     | 1.487            | 5.327             | 4.941       | 4.042       |

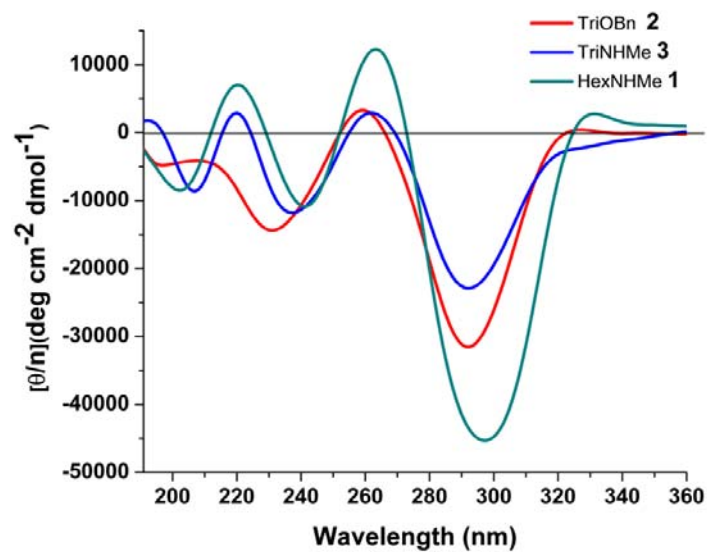

**Figure S14.** CD spectra of (Gly-3-Atc-Pro)<sub>n</sub> oligomers; tripeptides **2**, **3** and hexapeptide **1** at a concentration of 0.1 mM. All CD spectra were recorded in trifluoroethanol at 298 K.
